## 26 **Abstract**

27           Many Gram-negative plant and animal pathogenic bacteria employ a type III  
28 secretion system (T3SS) to secrete protein effectors into the cells of their hosts and  
29 promote disease. The plant pathogen *Acidovorax citrulli* requires a functional T3SS for  
30 pathogenicity. As with *Xanthomonas* and *Ralstonia spp.*, an AraC-type transcriptional  
31 regulator, HrpX, regulates expression of genes encoding T3SS components and type III-  
32 secreted effectors (T3Es) in *A. citrulli*. A previous study reported eleven T3E genes in  
33 this pathogen, based on the annotation of a sequenced strain. We hypothesized that this  
34 was an underestimation. Guided by this hypothesis, we aimed at uncovering the T3E  
35 arsenal of the *A. citrulli* model strain, M6. We carried out a thorough sequence analysis  
36 searching for similarity to known T3Es from other bacteria. This analysis revealed 51 *A.*  
37 *citrulli* genes whose products are similar to known T3Es. Further, we combined machine  
38 learning and transcriptomics to identify novel T3Es. The machine learning approach  
39 ranked all *A. citrulli* M6 genes according to their propensity to encode T3Es. RNA-Seq  
40 revealed differential gene expression between wild-type M6 and a mutant defective in  
41 HrpX. Data combined from these approaches led to the identification of seven novel T3E  
42 candidates, that were further validated using a T3SS-dependent translocation assay. These  
43 T3E genes encode hypothetical proteins, do not show any similarity to known effectors  
44 from other bacteria, and seem to be restricted to plant pathogenic *Acidovorax* species.  
45 Transient expression in *Nicotiana benthamiana* revealed that two of these T3Es localize  
46 to the cell nucleus and one interacts with the endoplasmic reticulum. This study not only  
47 uncovered the arsenal of T3Es of an important pathogen, but it also places *A. citrulli*  
48 among the "richest" bacterial pathogens in terms of T3E cargo. It also revealed novel  
49 T3Es that appear to be involved in the pathoadaptive evolution of plant pathogenic  
50 *Acidovorax* species.

## 51 **Author summary**

52 *Acidovorax citrulli* is a Gram-negative bacterium that causes bacterial fruit blotch  
53 (BFB) disease of cucurbits. This disease represents a serious threat to cucurbit crop  
54 production worldwide. Despite the agricultural importance of BFB, the knowledge about  
55 basic aspects of *A. citrulli*-plant interactions is rather limited. As many Gram-negative  
56 plant and animal pathogenic bacteria, *A. citrulli* employs a complex secretion system,  
57 named type III secretion system, to deliver protein virulence effectors into the host cells.  
58 In this work we aimed at uncovering the arsenal of type III-secreted effectors (T3Es) of  
59 this pathogen by combination of bioinformatics and experimental approaches. We found  
60 that this bacterium possesses at least 51 genes that are similar to T3E genes from other  
61 pathogenic bacteria. In addition, our study revealed seven novel T3Es that seem to occur  
62 only in *A. citrulli* strains and in other plant pathogenic *Acidovorax* species. We found that  
63 two of these T3Es localize to the plant cell nucleus while one partially interacts with the  
64 endoplasmic reticulum. Further characterization of the novel T3Es identified in this study  
65 may uncover new host targets of pathogen effectors and new mechanisms by which  
66 pathogenic bacteria manipulate their hosts.

## 67 **Introduction**

68           The genus *Acidovorax* (class Betaproteobacteria) contains a variety of species  
69 with different lifestyles. While some species are well adapted to soil and water  
70 environments, others have developed intimate relationships with eukaryotic organisms,  
71 including as plant pathogens [1]. Among the latter, *Acidovorax citrulli* is one of the most  
72 important plant pathogenic species [2]. This bacterium infects all aerial parts of cucurbit  
73 plants, causing bacterial fruit blotch (BFB) disease. The unavailability of effective tools  
74 for managing BFB, including the lack of resistance sources, and the disease's high  
75 destructive potential, exacerbate the threat BFB poses to cucurbit (mainly melon and  
76 watermelon) production [3, 4]. Despite the economic importance of BFB, little is known  
77 about basic aspects of *A. citrulli*-plant interactions.

78           On the basis of genetic and biochemical features, *A. citrulli* strains are divided  
79 into two main groups: group I strains have been generally isolated from melon and other  
80 non-watermelon cucurbits, whereas group II strains have been mainly isolated from  
81 watermelon [5-7]. *Acidovorax citrulli* M6 is a group I strain that was isolated in 2002  
82 from a BFB outbreak of melons in Israel [5], and subsequently became a model group I  
83 strain for investigation of basic aspects of BFB. The *A. citrulli* M6 genome has been  
84 sequenced, first by Illumina MiSeq [8] and recently, by PacBio [9], which allowed its  
85 complete closure.

86           As many Gram-negative plant and animal pathogenic bacteria, *A. citrulli* relies on  
87 a functional type III secretion system (T3SS) to promote disease [10]. This complex  
88 secretion system is employed by these pathogens to deliver protein effectors into target  
89 eukaryotic cells. Collectively, type III-secreted effectors (T3Es) promote disease by  
90 modulating a variety of cellular functions for the benefit of the pathogen [11-13]. In the  
91 case of plant pathogenic bacteria, type III-secreted effectors (T3Es) were shown to

92 promote virulence through alteration of the plant cell metabolism and/or suppression of  
93 host immune responses [14, 15]. As part of their defence mechanism, plants recognize  
94 some effectors by corresponding disease resistance (R) proteins, mostly belonging to the  
95 nucleotide-binding (NB)-leucine-rich repeat (LRR) type of immune receptors (NLRs)  
96 [16, 17]. Upon effector recognition, the R protein elicits a battery of defense responses  
97 collectively referred to as effector-triggered immunity (ETI). ETI is often accompanied  
98 by the hypersensitive response (HR), a rapid death of plant cells at the infection site that  
99 arrests pathogen spread in the plant tissue [18]. Therefore, elucidating the arsenal of  
100 effectors and their contribution to virulence, are of critical importance for the  
101 understanding of basic aspects of pathogenicity but also for translational research in the  
102 crop protection field.

103         Due to the requirement of type III secretion (T3S) for pathogenicity in susceptible  
104 plants and HR elicitation in resistant plants, the genes encoding key T3SS regulators and  
105 structural components in plant pathogenic bacteria are named *hrp* genes (for HR and  
106 pathogenicity) or *hrc* genes, in the case of hrp genes that are conserved among different  
107 bacterial genera, including in animal pathogens [19]. On the basis of gene content, operon  
108 organization and regulation, *hrp* clusters are divided into two classes: class I contains the  
109 *hrp* clusters of *Pseudomonas syringae* and enteric plant pathogenic bacteria, while class  
110 II contains the clusters of *Xanthomonas* species, *Ralstonia solanacearum* and plant  
111 pathogenic *Acidovorax* spp. [10, 19, 20].

112         In *Xanthomonas* spp. and *R. solanacearum*, the expression of *hrp*, *hrc* and hrp-  
113 associated (*hpa*) genes, as well as of some T3E genes, is regulated by HrpG and  
114 HrpX/HrpB (HrpX in *Xanthomonas* spp. and HrpB in *R. solanacearum*). HrpG belongs  
115 to the OmpR family of two-component system response regulators and controls  
116 expression of *hrpX/hrpB* [21-23]. *hrpX* and *hrpB* encode AraC-type transcriptional

117 activators that directly mediate the expression of most *hrp/hrc* operons and many T3E  
118 genes, via binding to DNA motifs that are present in their promoter regions. These DNA  
119 motifs are named plant-inducible promoter (PIP) box (TTCGB-N15-TTCGB; B being  
120 any nucleotide except adenine) in *Xanthomonas* spp. [24] and *hrp*<sub>II</sub> box (TTCG-  
121 N16\_TTCG) in *R. solanacearum* [25]. Recently, Zhang *et al.* showed that the *hrpG* and  
122 *hrpX/hrpB* (thereafter *hrpX*) orthologous genes of the *A. citrulli* group II strain Aac5 are  
123 required for pathogenicity [26]. They also showed that HrpG activates expression of  
124 *hrpX*, which in turn, regulates the expression of a T3E gene belonging to the YopJ family.

125       Until recently, based on the annotation of the genome of the *A. citrulli* group II  
126 strain AAC00-1, we were aware of eleven genes showing similarity to known T3E genes  
127 from other bacteria [27]. Considering the higher numbers of T3E genes in several other  
128 plant pathogenic bacteria, we hypothesized that this is an underestimation of the actual  
129 number of T3Es in *A. citrulli*. We also hypothesized that *A. citrulli* may carry novel T3E  
130 genes that were not previously described in other bacteria. Guided by these hypotheses,  
131 we carried out a detailed sequence analysis of *A. citrulli* M6 open reading frames (ORFs)  
132 to identify genes with similarity to known T3E genes from other bacteria. We also  
133 combined machine-learning (ML) and RNA-Seq approaches to identify putative, novel  
134 *A. citrulli* T3Es. Further, we adapted a T3E translocation assay to verify T3S-dependent  
135 translocation of candidate effectors. Combining these approaches allowed identification  
136 of seven new T3Es that appear to be unique to plant pathogenic *Acidovorax* species.  
137 Subcellular localization of three of these T3Es in *N. benthamiana* leaves was also  
138 determined by *Agrobacterium*-mediated transient expression.

139

## 140 **Results**

141 **Identification of new T3E genes of *A. citrulli* by genome annotation, machine**  
142 **learning and sequence analyses**

143 Analysis of the genome of the group II *A. citrulli* strain AAC00-1 (GenBank  
144 accession CP000512.1) revealed eleven genes similar to T3E genes of other plant  
145 pathogenic bacteria [27]. These genes were present in all tested group II strains. In  
146 contrast, all assessed group I strains, including M6, lacked the effector gene *Aave\_2708*  
147 (gene ID according to the AAC00-1 annotation), encoding a *Xanthomonas euvesicatoria*  
148 XopJ homolog. Group I strains also had disrupted open reading frames (ORFs) in the  
149 genes *Aave\_3062*, encoding an effector similar to *Xanthomonas oryzae* pv. *oryzicola*  
150 *AvrRxo1*, and *Aave\_2166*, encoding a *X. euvesicatoria* AvrBsT homolog [27].

151 To identify new putative T3E genes of *A. citrulli* we applied a machine learning  
152 (ML) approach, that was successfully utilized for identification of new T3E genes of *X.*  
153 *euvesicatoria* [28] and *Pantoea agglomerans* [29]. Using this algorithm, all ORFs of a  
154 bacterial genome are scored according to their propensity to encode T3Es. The scoring is  
155 based on a large set of features including similarity to known T3E genes, genomic  
156 organization, amino acid composition bias, characteristics of the putative N-terminal  
157 translocation signal and GC content, among others (see Methods).

158 An initial ML run was used to classify all ORFs of strain AAC00-1 according to  
159 their probability to encode T3Es. This strain, rather than M6, was used for learning and  
160 prediction, because at the time this ML was conducted, the AAC00-1 genome was fully  
161 assembled with better annotation. For training, the positive set included 12 AAC00-1  
162 genes that encoded T3E homologs: the eleven genes described by Eckshtain-Levi *et al.*  
163 [27] and one additional gene, *Aave\_2938* that is identical to *Aave\_2708*. The negative set  
164 included genes that showed high sequence similarity to ORFs of a non-pathogenic  
165 *Escherichia coli* strain. The output of this ML run was a list of all annotated genes of *A.*

166 *citrulli* AAC00-1 ranked by their propensity to encode T3Es (S1 Table). For each ORF,  
 167 we searched for the homolog in *A. citrulli* M6. Among the top predictions from AAC00-1,  
 168 many genes did not have homologs in M6. As expected, the aforementioned 12 positive  
 169 T3E genes of AAC00-1 were ranked high in this list (among the 36 highest scoring  
 170 predictions, with eight being ranked among the top 10, and eleven among the top 15; S1  
 171 Table). Results from this first ML run served, together with RNA-Seq data, as the basis  
 172 for selection of candidate T3E (CT3E) genes for experimental validation (see below).

173 In parallel, we performed an extensive homology search, using BlastP, to identify  
 174 additional putative T3E genes of *A. citrulli* M6. This analysis led to the identification of  
 175 many additional genes with significant similarity to T3E genes from other plant  
 176 pathogenic bacteria. Table 1 summarizes the arsenal of putative T3E genes of *A. citrulli*  
 177 M6, based on its genome annotation and sequence similarity analysis. Overall, we found  
 178 51 putative T3E genes in the *A. citrulli* M6 genome, in support of the notion that *A. citrulli*  
 179 has a larger T3E repertoire than previously estimated. Most of these genes also received  
 180 high scores in the ML search ranking among the top 100 ORFs (Table 1 and S1 Table).  
 181 With that said, ten genes encoding T3E homologs were ranked in very low positions in  
 182 the ML run (positions 231 to 1161; Table 1). On the other hand, many top ranked genes  
 183 were annotated as encoding hypothetical proteins, some of which could encode yet  
 184 unknown T3Es.

185

186 **Table 1. List of putative T3E genes of *Acidovorax citrulli* M6 based on genome**  
 187 **annotation and sequence similarity (BlastP) to known T3E genes from other plant**  
 188 **pathogenic bacteria.**

| Locus_tag<br>M6 <sup>1</sup> | Annotation<br>in M6 <sup>1</sup> | Similarity <sup>2</sup>      | ML1 <sup>3</sup> | ML2 <sup>3</sup> | Locus_tag<br>AAC00-1 <sup>4</sup> | X <sup>5</sup> | R <sup>5</sup> | P <sup>5</sup> |
|------------------------------|----------------------------------|------------------------------|------------------|------------------|-----------------------------------|----------------|----------------|----------------|
| <i>APS58_0030</i>            | <i>HP</i>                        | Type III effector<br>HopBN1  | 171              | 8                | <i>Aave_2531</i>                  | +              | +              | +              |
| <i>APS58_0167</i><br>6       | <i>avrBsT</i>                    | Avirulence protein<br>AvrBsT | 3                | 15               | <i>Aave_2166</i>                  | +              | +              | +              |



|                   |                                       |                                                   |            |     |                  |     |     |     |
|-------------------|---------------------------------------|---------------------------------------------------|------------|-----|------------------|-----|-----|-----|
| <i>APS58_0178</i> | <i>HP</i>                             | Type III effector HopF2                           | not in ML1 | 131 | -                | +   | (+) | +   |
| <i>APS58_0492</i> | <i>avrPphE</i>                        | Avirulence protein AvrPphE family                 | 14         | 32  | <i>Aave_3452</i> | +   | +   | +   |
| <i>APS58_0502</i> | <i>yopJ</i>                           | Type III effector YopP/AvrRxv family              | 5          | 23  | <i>Aave_3462</i> | +   | +   | (+) |
| <i>APS58_0506</i> | <i>HP</i>                             | Avirulence protein AvrPphE family                 | not in ML1 | 12  | -                | +   | +   | +   |
| <i>APS58_0542</i> | <i>hopD2</i>                          | Type III effector HopD2/HopAO1                    | 28         | 26  | <i>Aave_3502</i> | +   | +   | +   |
| <i>APS58_0658</i> | <i>HP</i>                             | Type III effector XopN                            | 103        | 13  | <i>Aave_3621</i> | +   | +   | +   |
| <i>APS58_0664</i> | <i>HP</i>                             | Type III effector XopQ                            | 86         | 107 | <i>Aave_3626</i> | +   | +   | +   |
| <i>APS58_0885</i> | <i>HP</i>                             | Type III effector ( <i>R. solanacearum</i> )      | 231        | 81  | <i>Aave_3847</i> | (+) | +   | -   |
| <i>APS58_1000</i> | <i>HP</i>                             | Type III effector protein                         | 814        | 98  | <i>Aave_3961</i> | +   | +   | -   |
| <i>APS58_1023</i> | <i>xopD</i>                           | Type III effector XopD                            | 265        | 38  | <i>Aave_4359</i> | +   | (+) | (+) |
| <i>APS58_1209</i> | <i>HP</i>                             | Type III effector YopP/AvrRxv family              | not in ML1 | 3   | -                | -   | +   | -   |
| <i>APS58_1255</i> | <i>HP</i>                             | Type III effector XopAE                           | 161        | 18  | <i>Aave_4254</i> | +   | -   | -   |
| <i>APS58_1433</i> | <i>HP</i>                             | Type III effector HopBD1                          | 367        | 42  | <i>Aave_4427</i> | +   | -   | +   |
| <i>APS58_1482</i> | <i>HP</i>                             | Type III effector XopF1                           | 241        | 28  | <i>Aave_4472</i> | +   | -   | (+) |
| <i>APS58_1627</i> | <i>HP</i>                             | Type III effector protein                         | 223        | 143 | <i>Aave_4606</i> | -   | +   | -   |
| <i>APS58_1634</i> | <i>HP</i>                             | Type III effector XopR                            | 51         | 24  | <i>Aave_4612</i> | +   | -   | -   |
| <i>APS58_1657</i> | <i>HP</i>                             | LRR protein, type III effector PopP               | 73         | 110 | <i>Aave_4631</i> | +   | +   | -   |
| <i>APS58_1658</i> | <i>HP</i>                             | LRR protein, outer protein XopAC                  | 43         | 52  | <i>Aave_4632</i> | +   | (+) | (+) |
| <i>APS58_1676</i> | <i>HP</i>                             | Type III effector protein                         | not in ML1 | 25  | -                | +   | +   | (+) |
| <i>APS58_1760</i> | <i>T3E protein</i>                    | Type III effector protein                         | 8          | 16  | <i>Aave_4728</i> | +   | +   | +   |
| <i>APS58_1921</i> | <i>avrPph3</i>                        | Cysteine protease avirulence protein YopT/AvrPphB | 61         | 4   | <i>Aave_0085</i> | +   | +   | +   |
| <i>APS58_1966</i> | <i>xopJ</i>                           | Type III effector XopJ                            | not in ML1 | 9   | -                | +   | +   | +   |
| <i>APS58_2045</i> | <i>avrRpt2</i>                        | Cysteine protease avirulence protein AvrRpt2      | 156        | 14  | <i>Aave_0201</i> | -   | -   | +   |
| <i>APS58_2122</i> | <i>xopAG</i>                          | Type III effector HopG1/AvrGf1/XopAG              | 6          | 10  | <i>Aave_0277</i> | +   | +   | +   |
| <i>APS58_2156</i> | <i>HP</i>                             | Type III effector XopC2                           | 951        | 100 | <i>Aave_0310</i> | +   | +   | -   |
| <i>APS58_2228</i> | <i>HP</i>                             | Type III effector SspH1 family                    | not in ML1 | 45  | -                | (+) | (+) | -   |
| <i>APS58_2229</i> | <i>putative T3E, E3 ligase domain</i> | Type III effector SspH1 family                    | not in ML1 | 50  | -                | (+) | (+) | -   |
| <i>APS58_2287</i> | <i>HP</i>                             | Type III effector XopK                            | 235        | 11  | <i>Aave_0433</i> | +   | -   | +   |

|                         |                                   |                                                         |            |     |                         |   |     |     |
|-------------------------|-----------------------------------|---------------------------------------------------------|------------|-----|-------------------------|---|-----|-----|
| <b>APSS58_2313</b>      | <i>LRR ribonuclease inhibitor</i> | LRR type III effector protein (GALA5)                   | 24         | 71  | <i>Aave_0458</i>        | - | +   | -   |
| <b>APSS58_2345</b>      | <i>HP</i>                         | Type III effector XopP                                  | 1161       | 17  | <i>Aave_0588</i>        | + | +   | -   |
| <i>APSS58_2589</i>      | <i>HP</i>                         | Type III effector YopP/AvrXv family                     | 32         | 5   | <i>Aave_0889</i>        | + | +   | (+) |
| <i>APSS58_2767</i>      | <i>HP</i>                         | Type III effector protein                               | not in ML1 | 64  | -                       | + | +   | -   |
| <b>APSS58_2799</b>      | <i>HP</i>                         | Putative AWR type III effector protein                  | 33         | 34  | <i>Aave_1090</i>        | - | +   | -   |
| <i>APSS58_3109</i>      | <i>HP</i>                         | Avirulence protein AvrXv3                               | 40         | 36  | <i>Aave_1373</i>        | + | +   | +   |
| <i>APSS58_3252</i>      | <i>HP</i>                         | Outer protein XopAC                                     | 56         | 118 | <i>Aave_1508</i>        | + | +   | -   |
| <b>APSS58_3261</b>      | <i>HP</i>                         | Type III effector HopBF1                                | 37         | 60  | <i>Aave_1520</i>        | - | (+) | +   |
| <b>APSS58_3289</b>      | <i>hopW1-1</i>                    | Type III effector HopW1-1/HopPmaA                       | 15         | 19  | <u><i>Aave_1548</i></u> | + | +   | +   |
| <i>APSS58_3303</i>      | <i>HP</i>                         | Type III effector XopE2                                 | not in ML1 | 1   | -                       | + | +   | +   |
| <b>APSS58_3344</b>      | <i>HP</i>                         | Type III effector XopAI                                 | 27         | 93  | <i>Aave_1647</i>        | + | -   | (+) |
| <i>APSS58_3751</i>      | <i>mltB_2</i>                     | Lytic murein transglycosylase, type III effector HopAJ2 | 36         | 285 | <u><i>Aave_3237</i></u> | + | +   | +   |
| <i>APSS58_3909</i>      | <i>HP</i>                         | Type III effector XopV                                  | 193        | 21  | <i>Aave_3085</i>        | + | +   | -   |
| <i>APSS58_3930</i>      | <i>HP</i>                         | Type III effector AvrRxo1-ORF2                          | 655        | 31  | <i>Aave_3063</i>        | + | -   | -   |
| <i>APSS58_3931</i><br>6 | -                                 | Type III effector AvrRxo1                               | 13         | -   | <u><i>Aave_3062</i></u> | + | -   | -   |
| <i>APSS58_3943</i>      | <i>HP</i>                         | Type III effector AvrPphF/HopF2                         | not in ML1 | 37  | -                       | - | +   | +   |
| <i>APSS58_4070</i>      | <i>HP</i>                         | Type III effector HopH1                                 | 7          | 6   | <u><i>Aave_2876</i></u> | + | +   | +   |
| <i>APSS58_4101</i>      | <i>HP</i>                         | Type III effector, lipase domain                        | 22         | 22  | <i>Aave_2844</i>        | + | +   | -   |
| <i>APSS58_4112</i>      | <i>avrBs1</i>                     | Avirulence protein AvrBs1/AvrA1                         | 4          | 7   | <u><i>Aave_2173</i></u> | + | -   | +   |
| <i>APSS58_4113</i>      | <i>HP</i>                         | Avirulence protein AvrBs1/AvrA1                         | 16         | 2   | <i>Aave_2174</i>        | + | -   | +   |
| <b>APSS58_4317</b>      | <i>HP</i>                         | Type III effector HopD1                                 | 34         | 33  | <i>Aave_2802</i>        | + | +   | -   |

189 <sup>1</sup> Locus\_tag and annotation according to GenBank accession CP029373 [9]. Bolded genes were  
 190 found to be significantly regulated by HrpX based on RNA-Seq results (S2 Table). *HP*,  
 191 hypothetical protein.

192 <sup>2</sup> Similarity based on BlastP analysis of the gene product.

193 <sup>3</sup> Ranking of the genes in machine learning (ML) runs 1 and 2. ML1 was done with ORFs of *A.*  
 194 *citrulli* AAC00-1 (GenBank accession CP000512.1) and ML2 was done with the ORFs of *A.*  
 195 *citrulli* M6 (GenBank accession CP029373). In column ML1, "not in ML1" means that this M6  
 196 gene was not detected in ML1 because it has no homologous gene in strain AAC00-1.

197 <sup>4</sup> Corresponding locus\_tag in *A. citrulli* AAC00-1. Underlined genes are the T3E genes that were  
198 known prior to this study, based on the annotation of the *A. citrulli* group II strain AAC00-1 [27],  
199 in addition of gene *Aave\_2708*, which is not present in strain M6.

200 <sup>5</sup> Similarity to gene products of *Xanthomonas* spp. (X), *Ralstonia* spp. (R) and *Pseudomonas*  
201 *syringae* group (P). + indicates significant similarity to at least one gene product; (+) indicates  
202 significant similarity to hits with relatively low query coverage (below 60%); – indicates that no  
203 significant hits were detected.

204 <sup>6</sup> These genes are probably non-functional in strain M6 and in all group I strains assessed so far  
205 [27].

206

207 An additional insight of this analysis was that most predicted T3E genes of *A.*  
208 *citrulli* share levels of similarity with T3E genes of *Xanthomonas* spp. and *R.*  
209 *solanacearum* (41 and 40 genes, respectively; Table 1). A smaller number of genes, 31,  
210 shared similarity with T3E genes of *P. syringae* strains. We also assessed the occurrence  
211 of these T3Es in other plant pathogenic *Acidovorax* species (S2 Table). Except for the  
212 HopBD1 homolog APS58\_1433 that could be detected only in *A. citrulli* strains, the other  
213 predicted T3Es occur in other pathogenic *Acidovorax* species, with some of them being  
214 widely distributed. For instance, the putative effectors APS58\_0492, APS58\_0506,  
215 APS58\_1482, APS58\_1657, APS58\_1658, APS58\_2228, APS58\_2313, APS58\_2345,  
216 APS58\_2799, APS58\_3303 and APS58\_3751 could be detected, at different levels of  
217 similarity, in all species. The other putative effectors were restricted to fewer species,  
218 with most of them being detected in *A. avenae* strains. While this may reflect the close  
219 relatedness between *A. citrulli* and *A. avenae* [30], it is important to consider that, at the  
220 time of this analysis, the public database contained 7 and 18 genomes of *A. citrulli* and *A.*  
221 *avenae* strains, respectively, but only two draft genomes of *A. oryzae* and one draft  
222 genome for each of the other species.

223 Interestingly, of the 51 putative T3E genes of *A. citrulli* M6, ten were not present  
224 in the genome of the group II strain AAC00-1 (Table 1). Besides M6 and AAC00-1, the

225 NCBI database includes draft genomes of one additional group II strain, KAAC17055,  
226 and four group I strains (pslb65, tw6, DSM 17060 and ZJU1106). BlastN analyses  
227 revealed that these ten genes are also absent in strain KAAC17055, but present in most  
228 of the group I strains. The only exceptions were *APS58\_0506* that was not detected in  
229 strains tw6 and DSM 17060, *APS58\_1209* that was not detected in tw6, and *APS58\_2767*  
230 that was not detected in DSM 17060. The inability to detect these T3E genes in the  
231 genomes of strains tw6 and DSM 17060 could reflect true absence in these strains but  
232 also could be due to the draft nature of these genomes. In any case, these results strongly  
233 suggest that the ten M6 T3E genes that are absent in the group II strains AAC00-1 and  
234 KAAC17055 could be specific to group I strains of *A. citrulli*. Yet, this assumption should  
235 be verified on a larger collection of strains. Interestingly, among these ten T3E genes,  
236 *APS58\_0506*, *APS58\_2228* and *APS58\_3303*, were detected in strains of all other plant  
237 pathogenic *Acidovorax* species (S2 Table). In the case of *APS58\_2228*, it should be  
238 mentioned that the group II strains AAC00-1 and KAAC17055 possess genes  
239 (*Aave\_0378* in AAC00-1) that encode short products (140 a.a.) and partially align with  
240 the C-terminal region of the group I product (with predicted length of 538 a.a.). In our  
241 analysis we did not consider them as ortholog genes.

242

### 243 **HrpX is required for pathogenicity of *A. citrulli* M6 and regulates the expression of** 244 **T3SS components and T3E genes**

245 In *Xanthomonas* spp. and *R. solanacearum*, the transcriptional regulator HrpX  
246 (HrpB in *R. solanacearum*) plays a key role in regulation of *hrp* and T3E genes. We  
247 hypothesized that this is also the case in *A. citrulli* M6. To assess this hypothesis, we first  
248 generated an *A. citrulli* M6 strain mutated in *APS58\_2298*, the *hrpX* orthologous gene.  
249 This mutant lost the ability to cause disease in melon (Fig 1A) and induce HR in pepper

250 leaves (Fig 1B), as previously observed for a strain carrying a mutation in the *hrcV* gene,  
251 which encodes a core component of the T3SS [10]. A similar loss of pathogenicity was  
252 observed for a mutant defected in the *hrpG* homolog gene, *APS58\_2299* (S1 Fig).  
253 Complementation of both *hrpX* and *hrpG* mutations restored pathogenicity, although  
254 necrotic symptoms induced by the complemented strains were less severe than those  
255 induced by the wild-type strain (S1 Fig).

256

257 **Fig 1. HrpX is required for pathogenicity and regulates expression of T3S and T3E**  
258 **genes in *Acidovorax citrulli* M6.** (A) Disease lesions produced in a melon leaf inoculated  
259 with wild-type M6, but not with mutant strains defective in *hrpX* or *hrcV* (encoding a core  
260 component of the T3SS) genes. The picture was taken at 3 days after infiltration (d.a.i).  
261 (B) Cell death observed in a pepper leaf following inoculation with wild-type M6, but not  
262 with *hrpX* and *hrcV* mutants. The picture was taken at 4 d.a.i. In (A) and (B), leaves were  
263 syringe-infiltrated with bacterial suspension of  $10^8$  CFU/ml. (C) Qualitative assessment  
264 of differential gene expression between wild-type M6 and the M6 *hrpX* mutant after 72 h  
265 of growth in XVM2 minimal medium at 28 °C. gDNA, amplification of genomic DNA.  
266 cDNA, reverse-transcriptase (RT)-PCR of RNA extracts. Genes: *hrcV* (*APS58\_2306*),  
267 *hrcT* (*APS58\_2309*), *hrcJ* (*APS58\_2321*) and *hrcC* (*APS58\_2331*), encoding core  
268 components of the T3SS; *APS58\_3289*, encoding a T3E similar to *Pseudomonas syringae*  
269 *hopW1-1*; and *GADPH*, glyceraldehyde-3-phosphate dehydrogenase (*APS58\_1610*;  
270 control gene).

271

272 Further, we used reverse transcription-PCR (RT-PCR) to compare expression of  
273 four genes encoding T3SS components and one T3E gene (*APS58\_3289*, encoding a *P.*  
274 *syringae* *hopW1-1* homolog of *hopW1-1*) between the *hrpX* mutant and wild-type M6  
275 following growth in XVM2 medium. This medium was optimized for expression of T3S  
276 genes in *X. euvesicatoria*, as it simulates, to some extent, the plant apoplast environment  
277 [31]. After 72 h of growth, expression of the tested genes was reduced in the *hrpX* mutant  
278 relative to wild-type M6 (Fig 1C).

279

## 280 **Identification of HrpX-regulated genes by RNA-Seq**

281       Based on RT-PCR results, we carried out RNA-Seq analysis to compare gene  
282 expression between wild-type M6 and the *hrpX* mutant, after 72 h of growth in XVM2  
283 medium. This approach revealed 187 genes showing significant differential expression  
284 (significant fold-change of  $\pm 2$ ) between the strains (Fig 2A). Of these, 159 genes had  
285 significantly reduced expression in the *hrpX* mutant relative to wild-type M6, while 28  
286 genes showed the opposite pattern (S3A and S3B Tables). RNA-Seq results were  
287 validated by qPCR experiments that confirmed lower expression of 10 tested genes in the  
288 *hrpX* mutant under the same conditions (Fig 2B).

289

290 **Fig. 2. Comparative transcriptomics analysis between *Acidovorax citrulli* M6 and the**  
291 **M6 *hrpX* mutant.** (A) Relative gene expression profile as assessed by RNA-Seq of cells  
292 grown for 72 h at 28 °C in minimal XVM2 medium (2 and 3 replicates for the *hrpX*  
293 mutant and wild-type strain, respectively). The *A. citrulli* M6 genome map is represented  
294 in the external circle. Internal red line shows differential gene expression between the  
295 strains. Genes within the gray zone: no significant differences between the strains. The -  
296 8 to 2 scale indicates relative expression of the mutant compared with the wild-type.  
297 Genes with significantly reduced or increased expression in the mutant relative to the  
298 wild-type strain are in the inner and outer regions relative to the gray zone, respectively.  
299 Arrows indicate the Hrp-T3SS cluster as well as genes with homology to known effectors  
300 from other plant pathogenic bacteria. (B) Relative expression of selected genes by qRT-  
301 PCR following bacterial growth under identical conditions as for the RNA-Seq  
302 experiment (3 biological replicates per strain). Asterisks indicate significant differences  
303 between wild-type and *hrpX* mutant at  $\alpha = 5\%$  by the Mann-Whitney non-parametrical  
304 test. All tested genes except *APS58\_2764* showed significantly reduced expression in the  
305 mutant relative to strain M6 in the RNA-Seq analysis.

306

307 Most HrpX-regulated genes could not be assigned to Gene Ontology (GO)  
308 categories using Blast2GO. Of the 159 genes that showed reduced expression in the *hrpX*  
309 mutant, only 47 were assigned to at least one biological process category. Blast2GO  
310 results are detailed in S3C and S3D Tables, and Fig 3 shows the number of biological  
311 process categories of genes with reduced expression in the mutant. Among the most  
312 frequent categories, 10 hits were found for transmembrane transport proteins, including  
313 several ABC transporters and permeases, and 6 matched with regulation of transcription.  
314 Nine hits belonged to protein secretion/protein secretion by the T3SS and these  
315 corresponded to genes encoding Hrp/Hrc components. Notably, most T3S and T3E genes  
316 could not be assigned to any specific GO biological process; this was the case for 11  
317 *hrp/hrc/hpa* genes and for 24 T3E genes (S3C Table). Overall, RNA-Seq revealed 20  
318 *hrp/hrc/hpa* genes and 27 genes encoding putative T3Es (including the seven new  
319 effectors identified in this study; see below) that had significantly reduced expression in  
320 the *hrpX* mutant relative to wild-type M6 (S3B and S3C Tables). Importantly, almost 60  
321 genes that showed reduced expression in the *hrpX* mutant are annotated as hypothetical  
322 proteins and did not show similarity to known T3E genes. It is possible that some of these  
323 genes encode novel T3Es.

324

325 **Fig. 3. Distribution of *Acidovorax citrulli* M6 HrpX-regulated genes among**  
326 **categories of biological processes.** Of the 159 genes that showed reduced expression in  
327 the *hrpX* mutant relative to wild-type M6, only 47 could be assigned to at least one Gene  
328 ontology (GO) biological process category (blue columns). HrpX-regulated genes  
329 encoding T3S structural and accessory proteins (red column) and putative T3Es (green  
330 column) were manually assigned to these categories.

331

332 Interestingly, the *hrpX* mutant also showed reduced expression of several genes  
333 encoding proteins that are putatively secreted by the type II secretion system (T2SS). We

334 used SignalP, Pred-Tat and Phobius tools to detect putative Tat or Sec type II secretion  
335 (T2S) signals in the ORFs of all genes that showed significantly lower expression in the  
336 *hrpX* mutant relative to the wild-type strain. While T2S signals were predicted in 39 genes  
337 by at least one of the tools (not shown), 14 genes were predicted to encode products with  
338 T2S signals by the three different tools (S3E Table). Among these genes were  
339 *APS58\_0633* (*xynB*) encoding 1-4- $\beta$ -xylanase, *APS58\_2599* (*pelA\_2*), encoding pectate  
340 lyase, and *APS58\_3722*, encoding a family S1 extracellular serine protease. These three  
341 genes were also shown to contain PIP boxes in their promoter region (S3B Table).

342 Of the 28 genes showing increased expression in the *hrpX* mutant relative to wild-  
343 type M6, only ten could be assigned to GO categories, most of which belonged to  
344 regulatory genes (regulation of transcription, phosphorelay signal transduction system,  
345 signal transduction; S3D Table).

346

#### 347 **Identification of PIP boxes in HrpX-regulated genes**

348 We used fuzznuc to search for perfect PIP boxes in the *A. citrulli* M6 genome,  
349 using the consensus sequence TTCGB-N15-TTCGB. Based on Koebnik *et al.* [32], we  
350 considered only those cases for which the distance between the end of the PIP box and  
351 the putative start codon was shorter than 650 nucleotides. This screen revealed a total of  
352 78 PIP boxes (S4 Table), of which 41 correlated with significant regulation by HrpX  
353 (Table 2 and S4 Table). We used the PIP boxes of the aforementioned 41 genes/operons  
354 to determine the consensus PIP box of *A. citrulli* using the MEME suite (Fig 4).  
355 Importantly, some of the PIP boxes are upstream of operons, thus probably regulating the  
356 expression of more than one gene. We detected additional 25 genes [marked as (+) in the  
357 PIP box column of S3B Table] that are likely in PIP box-containing operons and showing  
358 higher expression in the wild-type strain relative to the *hrpX* mutant. It is also worth



359 mentioning that eleven additional genes (some of which encoding T3Es) carrying PIP  
 360 boxes showed higher expression values in the wild-type relative to the *hrpX* mutant in the  
 361 RNA-Seq experiment, but were slightly below the level of statistical significance (S3A  
 362 and S4 Tables).

363

364 **Table 2. Perfect plant-inducible promoter (PIP) box sequences in genes that were**  
 365 **shown to be regulated by HrpX in *Acidovorax citrulli* M6.**

| Gene_ID <sup>1</sup>     | Annotation <sup>1</sup> | Strand | PIP box <sup>2</sup>       | Start of PIP box | End of PIP box | Gene start codon | Distance (bp) <sup>3</sup> |
|--------------------------|-------------------------|--------|----------------------------|------------------|----------------|------------------|----------------------------|
| APS58_0030               | HP                      | -      | ttcgtttgttgattgaaattcgc    | 34554            | 34578          | 34553            | 1                          |
| APS58_0077               | HP                      | -      | ttcgcaattcgagaattgttcgg    | 93187            | 93211          | 93022            | 165                        |
| APS58_0185               | HP                      | -      | ttcgtgtgaagcattcgttcgg     | 216423           | 216447         | 216315           | 108                        |
| APS58_0197               | <i>puuD_1</i>           | -      | ttcgtgcatcggtctccattcgc    | 227069           | 227093         | 226515           | 554                        |
| APS58_0218               | HP                      | -      | ttcgcgtgtgcgtgaactttcgc    | 254146           | 254170         | 254075           | 71                         |
| APS58_0500               | HP                      | -      | ttgccccggcctgccgacttcgc    | 579574           | 579598         | 579502           | 72                         |
| APS58_0502               | <i>yopJ</i>             | -      | ttgccccggcaggcaccgttcgc    | 583025           | 583049         | 582809           | 216                        |
| APS58_0543               | HP                      | -      | ttcgcatgcatgtgagcggattcgg  | 631454           | 631478         | 630839           | 615                        |
| APS58_0633               | <i>xynB</i>             | -      | ttcgcttctcctcaccgggttcgc   | 715951           | 715975         | 715863           | 88                         |
| APS58_0886               | HP                      | -      | ttcgcatcgccgtgcatgtttcgc   | 1015878          | 1015902        | 1015701          | 177                        |
| APS58_0986               | HP                      | +      | ttcgattcccgccgactgcttcgc   | 1113649          | 1113673        | 1113709          | 36                         |
| APS58_1000* <sup>4</sup> | HP                      | +      | ttgccaccggggcgcacggcttcgt  | 1129783          | 1129807        | 1129817          | 10                         |
| APS58_1026               | HP                      | -      | ttcgtgacagcgcctgccggttcgc  | 1161953          | 1161977        | 1161806          | 147                        |
| APS58_1255               | HP                      | +      | ttcgcgcgcccagccccgcttcgc   | 1409795          | 1409819        | 1410119          | 300                        |
| APS58_1340               | HP                      | +      | ttcgcatgtcccgagctgcttcgg   | 1511860          | 1511884        | 1512052          | 168                        |
| APS58_1448               | HP                      | -      | ttcgcgagggccacgattgcttcgc  | 1632395          | 1632419        | 1632309          | 86                         |
| APS58_1483               | HP                      | -      | ttcgattcccgtgccggttcgc     | 1669735          | 1669759        | 1669644          | 91                         |
| APS58_1760               | T3E protein             | +      | ttcgtgctcgcggcagctattcgc   | 1970321          | 1970345        | 1970408          | 63                         |
| APS58_1954               | HP                      | +      | ttcgcaagtctccagcttttcgg    | 2174442          | 2174466        | 2174654          | 188                        |
| APS58_1986               | HP                      | -      | ttcgcgcccagcgcgggacttcgc   | 2212320          | 2212344        | 2212063          | 257                        |
| APS58_2304               | <i>hrcQ</i>             | -      | ttcgcttacgcgatgagccttcgg   | 2546196          | 2546220        | 2546073          | 123                        |
| APS58_2307               | <i>hrcU</i>             | -      | ttcgcgcccggcggaaaccgcttcgc | 2550224          | 2550248        | 2550146          | 78                         |
| APS58_2308               | <i>hrpB7</i>            | +      | ttcgcttccggctgcggcgttcgc   | 2550284          | 2550308        | 2550387          | 79                         |
| APS58_2312               | <i>hrpW</i>             | +      | ttcgatccgctgcggcccttcgc    | 2553056          | 2553080        | 2553423          | 343                        |
| APS58_2314               | HP                      | +      | ttcgcgatcccgcagcttcgc      | 2556756          | 2556780        | 2556924          | 144                        |
| APS58_2329               | HP                      | -      | ttcgcaagccatgaagcaactcgt   | 2567741          | 2567765        | 2566734          | 7                          |
| APS58_2331               | <i>hrcC</i>             | -      | ttcgcaagccctgcggcgttcgc    | 2569879          | 2569903        | 2569803          | 76                         |
| APS58_2345               | HP                      | +      | ttcgcgcaaaggtgagcggcttcgc  | 2581209          | 2581233        | 2581585          | 352                        |
| APS58_2347               | HP                      | +      | ttcgaccgctgcagggttcgc      | 2585239          | 2585263        | 2585399          | 136                        |
| APS58_2599               | <i>pelA_2</i>           | -      | ttcggtgcatggcccgccttcgc    | 2862541          | 2862565        | 2862501          | 40                         |
| APS58_2771               | HP                      | +      | ttggaccgctgcggcgttcgc      | 3052001          | 3052025        | 3052432          | 407                        |
| APS58_2974               | HP                      | -      | ttcgtccaggcaggctgttcgc     | 3262651          | 3262675        | 3262590          | 61                         |
| APS58_3261               | HP                      | +      | ttcgctggcgcgaatgcgggttcgc  | 3574633          | 3574657        | 3574825          | 168                        |
| APS58_3289               | <i>hopW1-1</i>          | -      | ttgccggggagggcagttttcgc    | 3605458          | 3605482        | 3605197          | 261                        |
| APS58_3297               | HP                      | -      | ttcgggggtgcactccgcttcgg    | 3611673          | 3611697        | 3611575          | 98                         |
| APS58_3344               | HP                      | -      | ttcgaccctccccggcacttcgc    | 3656278          | 3656302        | 3656147          | 131                        |
| APS58_3685               | HP                      | -      | ttcgacgttgacatgacttcgc     | 3989762          | 3989786        | 3989700          | 62                         |
| APS58_3722               | HP                      | +      | ttcgttttaagacgaagaaattcgc  | 4030992          | 4031016        | 4031209          | 193                        |
| APS58_4095               | HP                      | +      | ttcgatccatggggccggttcgc    | 4442672          | 4442696        | 4443213          | 517                        |
| APS58_4116               | HP                      | -      | ttcgcgagcgcgactgcggttcgc   | 4476037          | 4476061        | 4475953          | 84                         |
| APS58_4317               | HP                      | -      | ttcgaccgctggccatgcttcgc    | 4692889          | 4692913        | 4692529          | 360                        |

366 <sup>1</sup> Locus\_tag and annotation according to GenBank accession CP029373. HP, hypothetical protein.

367 <sup>2</sup> PIP box consensus: TTCGB-N15-TTCGB (where B is any nucleotide except adenine).

368 <sup>3</sup> Distance between the end of the PIP box and the first nucleotide of the start codon.

369 <sup>4</sup> Gene *APS58\_1000\**: this gene was not annotated in the new M6 annotation. It is located  
370 between genes *APS58\_0999* and *APS58\_1000* (positions 1129817-1130383), and its expression  
371 was confirmed by RNA-Seq.

372

373 **Fig. 4. Sequence logo of the *Acidovorax citrulli* M6 plant-inducible promoter (PIP)**  
374 **box motif.** The logo was generated with MEME-ChIP based on multiple alignment of the  
375 41 perfect PIP boxes that were found to be associated with HrpX-regulated genes by  
376 RNA-Seq (see Table 2).

377

#### 378 **Establishment of a translocation assay for validation of *A. citrulli* T3Es**

379 A critical prerequisite for the discovery of new T3Es is the availability of a  
380 suitable translocation assay. We assessed the possibility of exploiting the *avrBs2-Bs2*  
381 gene-for-gene interaction to test translocation of predicted *Acidovorax* T3Es into plant  
382 cells. The *X. euvesicatoria* AvrBs2 effector elicits an HR in pepper plants carrying the  
383 *Bs2* resistance gene [33]. A truncated form of this effector, carrying amino acids 62-574  
384 (AvrBs2<sub>62-574</sub>), lacks the N-terminal T3S translocation signal, but retains the ability to  
385 elicit the HR when expressed in *Bs2* pepper cells [34]. The *avrBs2-Bs2* translocation  
386 assay is thus based on generation of plasmids carrying the candidate T3E (CT3E) genes  
387 fused upstream and in frame to the AvrBs2<sub>62-574</sub>. The plasmid is then mobilized into a *X.*  
388 *euvesicatoria* 85-10 *hrpG\**Δ*avrBs2* strain, that constitutively expresses *hrpG* and lacks  
389 *avrBs2*. The resulting strain is used to inoculate leaves of the pepper line ECW20R that  
390 carries the *Bs2* gene. If the AvrBs2<sub>62-574</sub> domain is fused with a T3E gene, this elicits a  
391 *Bs2*-dependent HR [34]. Teper *et al.* recently used this reporter system to validate novel  
392 T3Es of the *X. euvesicatoria* strain 85-10 [28].

393 Given the close similarity between the T3SSs of *A. citrulli* and *Xanthomonas* spp.,  
394 we hypothesized that the *X. euvesicatoria* T3S apparatus would recognize and translocate

395 *A. citrulli* T3Es, and therefore, that the *avrBs2-Bs2* reporter system would be suitable for  
396 validating *A. citrulli* CT3E genes. To assess this hypothesis, we tested translocation of  
397 eight T3Es of *A. citrulli* showing similarity to known T3Es of other plant pathogenic  
398 bacteria. All tested fusions were translocated into pepper cells in a T3S-dependent manner  
399 and induced a *Bs2*-dependent HR in ECW20R pepper leaves. In contrast, HR was not  
400 detected when the fusions were tested in ECW30 leaves (lacking the *Bs2* gene), and when  
401 a *X. euvesicatoria* *hrpF* mutant (impaired in T3S) was used in these assays (Fig 5A).  
402 Overall, these results demonstrated the suitability of the *avrBs2-Bs2* assay for validation  
403 of *A. citrulli* CT3Es.

404

405 **Fig. 5. Translocation assays of T3Es of *Acidovorax citrulli* M6.** (A) Selected T3Es  
406 based on sequence similarity to T3Es from other plant pathogenic bacterial species (see  
407 Table 1). (B) Candidate T3Es (CT3Es) selected from ML and RNA-Seq analyses.  
408 T3E/CT3E ORFs were cloned in plasmid pBBR1MCS-2 upstream to the AvrBs2<sub>62-574</sub>  
409 domain, which elicits HR in ECW20R pepper plants carrying the *Bs2* gene, but not in  
410 ECW30R pepper plants that lack this gene. The plasmids were transformed into  
411 *Xanthomonas euvesicatoria* 85-10-*hrpG*\*- $\Delta$ *avrBs2*, and the resulting strains were used to  
412 inoculate pepper plants. All known T3Es (A) and seven among eleven tested CT3Es (B)  
413 elicited HR in ECW20R but ECW30R leaves, similarly to the positive control XopS-  
414 AvrBs2<sub>62-574</sub>. Infiltrated areas are surrounded by red circles. No HR was induced when  
415 leaves were inoculated with a *X. euvesicatoria* mutant impaired in T3S ( $\Delta$ *hrpF*)  
416 expressing T3E/CT3E-AvrBs2<sub>62-574</sub> fusions. Also, no HR was induced following  
417 inoculation with *X. euvesicatoria* 85-10-*hrpG*\*- $\Delta$ *avrBs2* without any plasmid (not  
418 shown) or with a plasmid expressing the AvrBs2<sub>62-574</sub> domain alone ( $\Delta$ N-terminal).  
419 Numbers at the top correspond to the locus\_tag in strain M6 (for example, 0492 is gene  
420 *APS58\_0492*).

421

422 **Seven novel T3Es of *A. citrulli* are translocated into plant cells**

423           Following validation of the *avrBs2-Bs2* reporter assay for *A. citrulli* T3Es, we  
424 selected seven CT3Es based on results from the first ML run and RNA-Seq analysis. Four  
425 genes that were ranked relatively low in the ML were also included in these experiments  
426 to evaluate the quality of the ML prediction (Table 3 and S1 Table). All seven CT3E  
427 genes, but not the low-ranked ML genes, were translocated (Fig 5B). The validated genes  
428 were annotated as hypothetical proteins, had a predicted PIP box, were shown to be  
429 positively regulated by HrpX, and ranked high in the ML run (Table 3 and S1 Table).  
430 Importantly, the gene *APS58\_1340*, which contains a PIP box in its promoter region and  
431 its expression is regulated by HrpX (Table 3) was not translocated, indicating that these  
432 two parameters alone are not sufficient for accurate prediction of T3Es.

433

434 **Table 3. Candidate T3E genes of *Acidovorax citrulli* M6 that were tested in the**  
435 ***avrBs2-Bs2* translocation assays.**

| Gene ID <sup>1</sup>            | Product                           | ML <sup>2</sup> | PIP <sup>3</sup> | RSEQ <sup>4</sup> | TRA <sup>5</sup> |
|---------------------------------|-----------------------------------|-----------------|------------------|-------------------|------------------|
| <i>APS58_0500</i>               | Hypothetical protein <sup>7</sup> | 39/48           | +                | +                 | +                |
| <i>APS58_0705</i>               | GrxD, glutaredoxin-4              | 91/2203         | -                | -                 | -                |
| <i>APS58_0863</i>               | Hypothetical protein              | 64/749          | -                | -                 | -                |
| <i>APS58_1000</i> <sup>*6</sup> | Hypothetical protein <sup>7</sup> | 21/*            | +                | +                 | +                |
| <i>APS58_1340</i>               | Hypothetical protein              | 84/535          | +                | +                 | -                |
| <i>APS58_1448</i>               | Hypothetical protein <sup>7</sup> | 17/104          | +                | +                 | +                |
| <i>APS58_2974</i>               | Hypothetical protein <sup>7</sup> | 19/29           | +                | +                 | +                |
| <i>APS58_3297</i>               | Hypothetical protein <sup>7</sup> | 20/61           | +                | +                 | +                |
| <i>APS58_4095</i>               | Hypothetical protein <sup>7</sup> | 31/46           | +                | +                 | +                |
| <i>APS58_4116</i>               | Hypothetical protein <sup>7</sup> | 11/43           | +                | +                 | +                |
| <i>APS58_4399</i>               | Hypothetical protein              | 174/739         | -                | -                 | -                |

436 <sup>1</sup> Gene IDs are according to the annotation of the *A. citrulli* M6 chromosome (GenBank accession  
437 CP029373).

438 <sup>2</sup> ML: rankings in first/second machine learning (ML) runs. \*, gene *APS58\_1000*\* was not  
439 included in the second ML run (see below).

440 <sup>3</sup> PIP: presence (+) or absence (-) of perfect plant-inducible promoter (PIP) box in the promoter  
441 region.

442 <sup>4</sup> RSEQ: significantly reduced expression in the *hrpX* mutant relative to the wild type (+)/no  
443 significant differences between strains (-).

444 <sup>5</sup> TRA: translocated (+)/non-translocated (-) in *avrBs2-Bs2* translocation assays (rows of validated  
445 genes are shaded with gray).

446 <sup>6</sup> *APS58\_1000\**: this gene ranked high in the first ML but was not annotated in the recent  
447 annotation of *A. citrulli* M6, although its expression was confirmed by RNA-Seq. Its ORF is  
448 located between genes *APS58\_0999* and *APS58\_1000* (positions 1129817-1130383).

449 <sup>7</sup> These genes were detected only in plant pathogenic *Acidovorax* species.

450

451 BlastP analyses of the seven newly identified T3E genes revealed strong similarity  
452 only to hypothetical proteins of plant pathogenic *Acidovorax* species. The fact that no  
453 homologs for these genes were detected in non-pathogenic *Acidovorax* strains (despite  
454 the availability of more than 70 genomes of such spp.) or in other plant pathogenic  
455 bacterial species suggests a specific and unique role for their products in *Acidovorax*  
456 pathogenicity. These seven genes were detected also in AAC00-1 (S2 Table) and in all  
457 other group I and II genomes available in NCBI. Some of them were widely distributed  
458 among other plant pathogenic *Acidovorax* species. For instance, *APS58\_4095* was also  
459 detected in *A. oryzae* and in *A. cattleyae*, and homologs with less than 60% query  
460 coverage were also present in *A. konjaci*, *A. anthurii* and *A. valerianellae*. In contrast,  
461 *APS58\_2974* was not detected in *Acidovorax* spp., other than *A. citrulli* and *A. avenae*  
462 (S2 Table). Searches for conserved domains in these T3Es did not provide any insight.

463

#### 464 **Assessment of localization of three of the newly identified T3Es**

465 We attempted to assess the subcellular localization of three of the newly identified  
466 T3Es, *APS58\_0500*, *APS58\_1448* and *APS58\_4116*. Prediction of subcellular  
467 localization using the Plant-mPLOC server indicated that the three effectors could localize  
468 to the nucleus. Browsing these T3Es with the LogSigDB server revealed endoplasmic

469 reticulum (ER) localization signals in the three effectors, and nuclear localization signals  
470 in APS58\_0500 and APS58\_4116.

471 We assessed localization of these effectors fused to the yellow fluorescent protein  
472 (YFP) in *Nicotiana benthamiana* leaves following transient expression by  
473 agroinfiltration. Based on the aforementioned predictions, in first experiments the leaves  
474 were co-infiltrated with *A. tumefaciens* carrying the ER marker mRFP-HDEL, and were  
475 also stained with DAPI for nucleus localization. Representative images from these  
476 experiments are shown in Fig 6. The results suggested that the three effectors could  
477 interact with the ER, but only APS58\_0500 and APS58\_1448 partially localized to the  
478 nucleus, including in clearly visible nuclear foci (Fig 6).

479

480 **Fig. 6. Transient expression of *Acidovorax citrulli* T3Es in *Nicotiana benthamiana*.**

481 The T3E genes *APS58\_0500*, *APS58\_4116* and *APS58\_1448*, identified by ML and  
482 RNA-Seq and validated in translocation assays, were cloned in the binary vector  
483 pEarleyGate101, fused to the C-terminus of YFP. The plasmids were transformed into  
484 *Agrobacterium tumefaciens* GV3101, and the resulting strains were used for transient  
485 expression in *N. benthamiana*. Leaves were co-inoculated with *A. tumefaciens* GV3101  
486 carrying the mRFP-HDEL endoplasmic reticulum marker and stained with DAPI for  
487 visualization of plant cell nuclei. Samples were visualized in a Leica SPE confocal  
488 microscope 48 h after inoculation. Bars at the right bottom of each picture, 20  $\mu$ m.

489

490 In a second set of experiments, the YFP-fused effectors were co-infiltrated with  
491 free-mCherry, localized mainly in the cytosol and in the nucleus, HDEL-mCherry,  
492 localized to the ER, and the membrane-bound protein SIDRP2A (L. Pizarro and M. Bar,  
493 unpublished results). Representative images from these experiments are shown in S2-S4  
494 Figs for APS58\_0500, APS58\_1448 and APS58\_4116, respectively. The three effectors  
495 partially co-localized with the membrane-bound protein SIDRPA, as evidenced by the  
496 Pearson correlation coefficients ( $0.40\pm 0.024$  for APS5\_0500,  $0.49\pm 0.040$  for

497 APS58\_1448, and  $0.53 \pm 0.037$  for APS58\_4116). Since APS58\_0500 appeared to have a  
498 stronger membrane localization, we used the classical plasma membrane microdomain  
499 protein Flot1 [35] as an additional membrane control marker. Indeed, APS58\_0500 had  
500 an expression pattern that was highly similar to that of Flot1 (compare top and bottom  
501 panels in S2 Fig). In agreement with the first set of experiments (Fig 6), APS58\_0500 (S2  
502 Fig) and APS58\_1448 (S3 Fig) partially localized to the nucleus. On the other hand, these  
503 experiments confirmed that only APS58\_4116 partially interacted with the ER, mostly at  
504 the nuclear envelope (Fig 6 and S4 Fig; Pearson coefficient with HDEL-mCherry  
505  $0.53 \pm 0.037$ ). None of the effectors was shown to have a significant cytosolic presence:  
506 the Pearson coefficient with mCherry was lower than 0.12 for APS\_0500 and APS\_4116,  
507 while for APS\_1448 the coefficient was  $0.53 \pm 0.037$ , due to the strong nuclear presence  
508 of this effector, as indicated above. Overall, we can conclude that the three effectors are  
509 associated with the plasma membrane, APS58\_0500 and APS58\_1448 partially localize  
510 to the nucleus, and APS\_4116 partially interacts with the ER.

511

### 512 **Generating an improved list of candidate T3Es of *A. citrulli* M6 with a second ML** 513 **run**

514 Machine learning can be improved after refinement of features specific to the  
515 studied pathogen. Thus, we carried out a second ML run using the *A. citrulli* M6 genome.  
516 The main differences between the first and second ML runs were: (i) the second run was  
517 done on the M6 genome [9], which by this time was fully assembled; (ii) we included the  
518 seven novel T3Es identified in this study in the positive set and the four ORFs that were  
519 found not to be translocated were added to the negative set; (iii) in the positive set we  
520 included ORFs with high sequence similarity to known effectors from other bacteria,  
521 based on our homology search results (Table 1); and (iv) we used HrpX-mediated

522 regulation as an additional feature used to train the classifier. The results are summarized  
523 in S5 Table. Most known/validated T3Es ranked among the top 100 hits, and among the  
524 top 40 hits, 34 were known/validated T3Es. Importantly, some genes with high propensity  
525 to encode T3Es (ranking among the top 60 in the second ML run) did not appear among  
526 the top 200 hits in the first ML list (Table 1 and S1 Table), thus supporting the higher  
527 reliability of the new list relative to the first prediction.

528         Among the top 100 hits of the second ML run, there were 37 genes that matched  
529 to hypothetical proteins from the public database, with no similarity evidence to suggest  
530 a T3E nature. Since this was the case of the seven T3Es validated in this study, it is  
531 possible that some of these genes encode previously undiscovered T3Es. In this regard, it  
532 is worth mentioning genes *APS58\_1954*, *APS58\_1986*, *APS58\_3685*, *APS58\_0987* and  
533 *APS58\_1694* (ranking at positions 20, 27, 57, 62 and 83 in the second ML, respectively).  
534 While *APS58\_1694* shares similarity only with hypothetical proteins of plant pathogenic  
535 *Acidovorax* species, the first four also share similarities to hypothetical proteins of other  
536 plant pathogenic genera (eg., *Xanthomonas*, *Ralstonia*, *Pseudomonas* and/or *Erwinia*).  
537 These genes also showed increased expression in wild-type M6 relative to the *hrpX*  
538 mutant, and have PIP boxes in their promoter region. Therefore, these genes are strong  
539 candidates for further experimental validations.

540

## 541 **Discussion**

542         Type III effectors (T3Es) play a dual role in the interaction between many Gram-  
543 negative plant pathogenic bacteria and plants: while they collectively promote virulence  
544 on susceptible plants, some may induce effector-triggered immunity (ETI) in plants  
545 carrying the corresponding resistance (*R*) genes. *R* genes provide resistance against  
546 economically important pathogens and have been mobilized to commercial crop varieties



547 by breeding programs. Thus, this is one of the most important means of disease  
548 management [36, 37].

549 *Acidovorax citrulli* requires a functional type III secretion (T3S) system for  
550 pathogenicity [10]. The main objective of this study was to significantly advance the  
551 current knowledge about the arsenal of T3Es of *A. citrulli*. Among well-investigated plant  
552 pathogenic bacteria, the pools of T3Es vary from only few effectors in phytopathogenic  
553 bacteria from the *Enterobacteriaceae* family, to approximately 20 to 40 in strains of *P.*  
554 *syringae* and *Xanthomonas* spp. [21, 28, 40-44] and an average of over 75 in *R.*  
555 *solanacearum* isolates [45, 46]. Thus, we hypothesized that the repertoire of *A. citrulli*  
556 T3Es could be much larger than the eleven T3E genes identified in the group II strain  
557 AAC00-1 [27].

558 As a first approach to uncover the arsenal of *A. citrulli* T3Es, we used a genome-  
559 wide machine learning (ML) algorithm to determine the propensity of ORFs to encode  
560 T3Es. In parallel, we looked carefully at the annotation of the group I model strain of *A.*  
561 *citrulli*, M6, and carried out BlastP analyses of the genes encoding hypothetical proteins  
562 or functions that could infer effector activity. These analyses revealed 51 putative T3E  
563 genes that shared different levels of similarity with known effector genes from  
564 *Xanthomonas* spp., *R. solanacearum* and/or *P. syringae* strains (Table 1). Homologs for  
565 most of these T3E genes and for those identified in the present study were also detected  
566 in other plant pathogenic *Acidovorax* species (S2 Table).

567 To identify new T3E genes of *A. citrulli*, we also used RNA-Seq to identify HrpX-  
568 regulated genes. Based on the knowledge accumulated with *Xanthomonas* spp. and *R.*  
569 *solanacearum* [22, 32, 47, 48], we expected that most genes encoding T3SS components  
570 and some T3Es of *A. citrulli* would be under the direct regulation of HrpX. This  
571 assumption was strengthened in preliminary experiments comparing gene expression

572 between a wild-type and a *hrpX* mutant strain (Fig 1C). As previously mentioned, Zhang  
573 *et al.* recently showed that HrpX controls the expression of one T3E gene in the group II  
574 strain, Aac5 [26].

575 The RNA-Seq approach revealed 159 genes showing significantly reduced  
576 expression in the *hrpX* mutant, while 28 genes had significantly increased expression in  
577 the mutant (S3 Table). These numbers are similar to those reported in gene expression  
578 studies carried out with *Xanthomonas* spp. HrpX and with *R. solanacearum* HrpB. For  
579 instance, microarray analyses of *Xanthomonas axonopodis* pv. *citri* (*Xac*) in XVM2  
580 medium revealed that 181 genes were up-regulated by HrpX, while 5 to 55 genes  
581 (depending on the time point) were down-regulated by this transcriptional regulator [47].  
582 Occhialini *et al.* found 143 HrpB up-regulated genes and 50 HrpB down-regulated genes  
583 in *R. solanacearum* [48]. In these, as well as in several other studies, HrpX/HrpB was  
584 found to regulate the expression of most genes encoding T3S components and accessory  
585 proteins as well as several T3E genes [21, 22, 49]. In line with this background, among  
586 the 159 HrpX up-regulated genes found in our study, 20 encoded *hrp/hrc/hpa* genes and  
587 27 encoded T3E genes. Interestingly, *hrcC* was a member of the *A. citrulli* HrpX regulon.  
588 *hrcC* expression in *X. euvesicatoria* is directly regulated by HrpG, in an HrpX-  
589 independent manner [31]. In contrast, in *R. solanacearum*, *hrcC* is regulated by HrpX  
590 [49, 50] as we found in *A. citrulli* M6.

591 In *Xanthomonas* spp. and in *R. solanacearum*, the HrpX/HrpB regulon includes  
592 many genes that are not involved in T3S [21, 47, 49]. A similar picture emerged from our  
593 study, where HrpX was shown to regulate genes involved in transmembrane transport,  
594 including several ABC transporters and permeases as well as transcriptional regulators.  
595 Among the HrpX up-regulated genes we also detected several genes whose products are  
596 putatively secreted by type II secretion (T2S). These included genes encoding 1-4- $\beta$ -

597 xylanase (*xynB*), pectate lyase and a protein with similarity to a family of S1 extracellular  
598 serine proteases (S3E Table). HrpX regulation of genes encoding type II-secreted  
599 enzymes was also demonstrated in *Xanthomonas* spp. and in *R. solanacearum* [22, 47,  
600 51-54].

601         Among the 159 HrpX up-regulated genes in *A. citrulli*, more than 60 carried  
602 perfect PIP boxes in their promoter region or were part of operons carrying perfect PIP  
603 boxes (Table 2; S3 and S4 Tables). Although some other genes may carry imperfect PIP  
604 boxes and may be directly regulated by HrpX, this result suggests that many of the HrpX  
605 up-regulated genes are indirectly regulated by this transcriptional factor. This is a  
606 reasonable assumption, considering that among the genes that are up- and down-regulated  
607 by HrpX, there are several transcriptional regulators. For instance, genes encoding  
608 transcriptional factors belonging to the LysR (*APS58\_0949* and *APS58\_2039*), IclR  
609 (*APS58\_1263*), FmbD (*APS58\_1340*) and TetR (*APS58\_3638*) families were shown to  
610 be up-regulated by HrpX. In contrast, two genes encoding DNA-binding response  
611 regulators, homologous to PhoP (*APS58\_0821*) and FixJ (*APS58\_1682*) were HrpX-  
612 down-regulated (S2B Table).

613         After demonstrating the suitability of the *avrBs2-Bs2* T3E translocation assay with  
614 eight known T3Es, we used the data obtained from the first ML run and the RNA-Seq  
615 analysis to select seven *A. citrulli* M6 ORFs for experimental validation (Fig 5). We  
616 validated translocation of the seven candidates, thus demonstrating the strength of  
617 combining ML and RNA-Seq for identifying T3E genes. Importantly, the lack of  
618 translocation of the four ORFs that received relatively low scores in the first ML run  
619 strengthened the suitability of our combined computational/experimental approach.

620         Remarkably, the seven effectors identified in this study were up-regulated by  
621 HrpX and carried PIP boxes in their promoter regions, while among the four non-

622 validated genes, only one had these traits (Table 3). An interesting trait of the seven new  
623 T3Es was that they share significant similarity only with hypothetical proteins of other  
624 plant pathogenic *Acidovorax* strains (Table 3 and S2 Table). This strongly supports that  
625 these effectors are unique to plant pathogenic *Acidovorax*. Importantly, a second ML run,  
626 informed by the knowledge accumulated from this study, revealed additional genes that  
627 were ranked in relatively high positions and encoded hypothetical proteins that occur only  
628 in plant pathogenic *Acidovorax* or in other plant pathogenic bacteria (S5 Table). These  
629 represent high priority CT3Es for future experimental validation assays. This emphasizes  
630 one benefit of the ML approach: its ability to integrate novel knowledge in the prediction  
631 algorithm.

632 Another interesting characteristic of the new T3Es discovered in this study is their  
633 relatively small size. Based on the annotation of the M6 genome, the average and median  
634 lengths of *A. citrulli* M6 T3Es are 387.7 and 345 amino acids (a.a.), respectively. Except  
635 for *APS\_4116* that encodes a 347-a.a. protein, the size of the six other new T3Es ranged  
636 from 113 a.a. (*APS58\_4095*) to 233 a.a. (*APS58\_0500*) (S5 Fig). In the public database  
637 (GenBank), there are several examples of small T3Es from plant pathogenic bacteria,  
638 including *Xanthomonas* AvrXv3 (most having 119 a.a.), *Pseudomonas syringae* HopAF1  
639 (112-291 a.a.), HopBF1 (125-207 a.a.), HopF2 (177-280 a.a.), HopH1 (201-218 a.a.) and  
640 AvrRpt2 (222-255 a.a.), and the *R. solanacearum/Xanthomonas* HopH1 homologs (155-  
641 218 a.a.).

642 In this study we assessed plant cell localization of three of the new T3Es validated  
643 in translocation assays, *APS58\_0500*, *APS58\_1448* and *APS58\_4116*. Utilization of  
644 subcellular localization prediction tools and confocal microscopy of *N. benthamiana*  
645 agro-infiltrated leaves strongly suggest that the three tested effectors interact with the  
646 plasma membrane (S2-S4 Figs), with *APS58\_0500* remarkably mimicking the

647 localization of the classical non-clathrin mediated endocytic system protein, Flot1 [35].  
648 While APS58\_4116 interacted with the endoplasmic reticulum (Fig 6 and S2 Fig),  
649 effectors APS58\_0500 and APS58\_1448 partially localized to the nucleus (Fig 6; S3 and  
650 S4 Figs). Interestingly, and in line with the predicted nuclear localization of these  
651 effectors, BlastP showed that APS58\_0500 has low similarity with an ATP-dependent  
652 RNA helicase of the Metazoa organism *Clonorchis sinensis* (query cover, 38%; e-value,  
653 0.23), while APS58\_1448 has low similarity to a transcriptional regulator of the  
654 bacterium *Hoeflea halophila* (query cover, 54%; e-value, 0.19-0.53), suggesting possible  
655 functions the *Acidovorax* effectors might execute upon entrance into the plant cell  
656 nucleus.

657 In conclusion, we have combined sequence analysis, ML and RNA-Seq  
658 approaches to uncover the arsenal of T3Es of the group I model strain of *A. citrulli*, M6,  
659 including discovery of new T3Es that appear to be unique to plant pathogenic *Acidovorax*  
660 spp. Further characterization of the novel T3Es identified in this study may uncover new  
661 host targets of pathogen effectors and new mechanisms by which pathogenic bacteria  
662 manipulate their hosts. We also demonstrated the suitability of a translocation reporter  
663 system for validation of *A. citrulli* T3Es, which we expect, will be very helpful to the  
664 *Acidovorax* research community. Until recently it was assumed that *A. citrulli* strains (and  
665 in general plant pathogenic *Acidovorax* strains) possess little over ten T3E genes.  
666 However, from this study it is clear that the *A. citrulli* pan-genome encodes more than 50-  
667 60 T3Es. Therefore, the *A. citrulli* T3E repertoire is larger than those of most well-  
668 characterized plant pathogenic bacteria, including plant pathogenic *Enterobacteria*, *P.*  
669 *syringae* pathovars, *Xanthomonas* spp. and, and closer in numbers to the T3E repertoires  
670 of *R. solanacearum*. Moreover, the second ML run suggested that *A. citrulli* may possess  
671 yet unrevealed T3E genes. Importantly, among the 58 known T3E genes of *A. citrulli* M6,

672 ten (17.2%) appear to be unique to group I strains. On the other hand, the group II model  
673 strain, AAC00-1, carries T3E genes that are absent or non-functional in group I strains as  
674 shown in our previous report [27] and in this study (Table 1 and S1 Table). Thus, it is  
675 logical to assume that the variability in T3E content between group I and II strains plays  
676 a critical role in shaping the differences in host-preferential association between the  
677 groups. Despite this, more research is needed to test this hypothesis, and to understand  
678 the mode of action and contribution of individual effectors to the virulence of *A. citrulli*.

679

## 680 **Methods**

### 681 **Bacterial strains and plasmids**

682 Bacterial strains and plasmids used in this study are listed in S6 Table. Unless  
683 stated otherwise, *Acidovorax citrulli* strains were grown at 28 °C in nutrient broth (NB;  
684 Difco Laboratories, Detroit, Michigan) or nutrient agar (NA; NB containing 15 g/L agar).  
685 For RT-PCR, qRT-PCR and RNA-seq experiments, *A. citrulli* strains were grown in  
686 XVM2 medium [31]. *Xanthomonas euvesicatoria*, *Agrobacterium tumefaciens* and  
687 *Escherichia coli* strains were cultured on Luria-Bertani (LB) medium [55] at 28 °C for *X.*  
688 *euvesicatoria* and *A. tumefaciens*, and 37 °C for *E. coli*. When required, media were  
689 supplemented with the following antibiotics: ampicillin (Ap, 100 µg/mL for *E. coli* and  
690 200 µg/mL for the others), rifampicin (Rif, 50 µg/mL), kanamycin (Km, 50 µg/mL), and  
691 gentamycin (Gm, 50 µg/mL for *A. citrulli* and 10 µg/mL for the others).

692

### 693 **Molecular manipulations**

694 Routine molecular manipulations and cloning procedures were carried out as  
695 described [55]. T4 DNA ligase and restriction enzymes were purchased from Fermentas  
696 (Burlington, Canada). AccuPrep® Plasmid Mini Extraction Kit and AccuPrep® PCR

697 Purification Kit were used for plasmid and PCR product extraction and purification,  
698 respectively (Bioneer Corporation, Daejeon, Republic of Korea). DNA was extracted  
699 with the GeneElute bacterial genomic DNA Kit (Sigma-Aldrich, St. Louis, MO, USA).  
700 PCR primers were purchased from Sigma-Aldrich and are listed in S7 Table. PCR  
701 reactions were performed with the Readymix Red Taq PCR reactive mix (Sigma-Aldrich)  
702 or with the Phusion high-fidelity DNA polymerase (Fermentas, Waltham, MA, USA)  
703 using an Eppendorf (Hamburg, Germany) thermal cycler. Sequencing of PCR fragments  
704 and constructs was performed at Hy Laboratories (Rehovot, Israel). *Escherichia coli* S17-  
705 1  $\lambda$ pir, DH5- $\alpha$  and DB3.1 strains were transformed using an Eppendorf 2510  
706 electroporator according to manufacturer's instructions. Plasmid mobilizations to *A.*  
707 *citrulli* and *X. euvesicatoria* strains were done by bi-parental mating as described [56]. *A.*  
708 *tumefaciens* cells were transformed by the heat shock method [57].

709

## 710 **Machine learning classifications**

711 In order to predict T3Es, we applied ML classification algorithms, which are  
712 similar to the ones we have previously described [28, 29, 58, 59]. The first ML run was  
713 used to search for T3Es in the AAC00-1 genome (GenBank accession CP000512.1). The  
714 training data included 12 ORFs that were known as T3Es (see in Results). The negative  
715 set included 2,680 ORFs that had high similarity (E-value less than 0.001) to ORFs in the  
716 non-pathogenic *E. coli* K12 genome (accession number NC\_000913.3). The positive and  
717 negative ORFs are marked in S1 Table. For this ML, 71 features were used, including  
718 homology (to known effectors or to bacteria without T3SS), composition (amino acid  
719 composition, GC content), location in the genome (e.g., distance from known T3Es), and  
720 the presence of a PIP box in the promoter region. The complete list of features is given in  
721 S8 Table. Features were extracted using in-house Python scripts. The outcome of the ML

722 run is a score for each ORF, reflecting its likelihood to encode a T3E. We evaluated  
723 several classification algorithms: random forest [60], naïve Bayes [61], support vector  
724 machine (SVM; [62]), K nearest neighbors (KNN), linear discriminate analysis (LDA),  
725 logistic regression (all three described in Hastie *et al.* [63]), and Voting, which aims to  
726 predict averaging over all other ML algorithms. For each run, feature selection was  
727 performed. The ML algorithms and feature selection were based on the Scikit-learn  
728 module in Python [64]. The area under the curve (AUC) score over 10-fold  
729 cross-validation was used as a measure of the classifier performance. The first ML run  
730 was based on the random forest classifier which gave the highest AUC (0.965).

731 The second ML run was similar to the first, with the following modifications.  
732 First, the classifiers were run on the M6 genome (GenBank accession CP029373).  
733 Second, the positive set included ORFs that were validated as T3Es in this study and  
734 ORFs with high sequence similarity to known effectors as described in Table 1. The  
735 negative set included 2,570 ORFs (S5 Table). The four ORFs that were experimentally  
736 shown not to be T3Es were also included in this negative set. Third, the expression data  
737 from the RNA-Seq analysis (HrpX regulation) were added as a feature. Fourth, the PIP  
738 box feature was updated to reflect the PIP box as inferred from promoter regions of  
739 *Acidovorax* T3Es (see additional bioinformatics tools below). The second ML run was  
740 based on Voting classifier, which included all the classifiers specified above, as it gave  
741 the highest AUC among all the classifiers. The AUC for this second ML run was 0.999.

742

### 743 **Generation of *A. citrulli* mutants and complemented strains**

744 *Acidovorax citrulli* M6 mutants disrupted in *hrpX* (*APS58\_2298*) and *hrpG*  
745 (*APS58\_2299*) genes were generated by single insertional mutagenesis following single  
746 homologous recombination. Internal fragments of the *hrpX* (383 bp) and *hrpG* (438 bp)



747 ORFs carrying nucleotide substitutions that encode early stop codons, were PCR-  
748 amplified and inserted into the *Bam*HI/*Eco*RI site of the suicide plasmid pJP5603 [65].  
749 The resulting constructs were transformed into *E. coli* S17-1  $\lambda$ pir, verified by sequencing,  
750 and mobilized into *A. citrulli* M6 by bi-parental mating. Transconjugants were selected  
751 by Km selection. Disruption of the target genes by single homologous recombination and  
752 plasmid insertion was confirmed by PCR and sequencing of amplified fragments. To  
753 generate complemented strains for mutants disrupted in *hrpX* and *hrpG* genes, the full  
754 ORFs of these genes (1407 pb and 801 bp, respectively) were PCR-amplified and cloned  
755 into the *Eco*RI/*Bam*HI sites of pBBR1MCS-5 [66]. The generated plasmids were  
756 transformed into *E. coli* S17-1  $\lambda$ pir, verified by sequencing, and transferred by bi-parental  
757 mating into the corresponding M6 mutant strains. Complemented strains were selected  
758 by Gm resistance and validated by PCR.

759

### 760 **Infiltration of melon and pepper leaves with *A. citrulli* strains**

761 Melon (*Cucumis melo*) cv. HA61428 (Hazera Genetics, Berurim, Israel) plants  
762 were grown in a greenhouse at ~28 °C. Pepper (*Capsicum annum*) cv. ECW20R and  
763 ECW30 [67] plants were grown in a growth chamber (16 h/26 °C in the light; 8 h/18 °C  
764 in the dark; relative humidity set to 70%). The three youngest, fully expanded leaves of  
765 3-week-old melon and 5-week-old pepper plants were syringe-infiltrated in the abaxial  
766 side with bacterial suspensions of *A. citrulli* strains containing 10<sup>8</sup> colony forming units  
767 (cfu)/mL in 10 mM MgCl<sub>2</sub>. Phenotypes were recorded 3 and 4 days after inoculation  
768 (d.a.i.), for melon and pepper leaves, respectively. For a better visualization of HR  
769 symptoms in pepper leaves, the infiltrated leaves were soaked in an acetic  
770 acid:glycerol:water solution (1:1:1 v/v) for 4 h and then transferred to ethanol and boiled  
771 for 10 min. Experiments were repeated twice with similar results.

772

### 773 **RNA isolation, cDNA synthesis and reverse transcription-PCR (RT-PCR)**

774 *Acidovorax citrulli* M6 and *hrpX* mutant were grown at 28 °C in 5 mL of XVM2  
775 medium for 72 h. Total RNA was isolated using TRI reagent (Sigma-Aldrich) and Direct-  
776 zol RNA miniprep kit (Zymo Research, Irvine, CA, USA) according to manufacturer's  
777 instructions. Samples were treated with RNase free DNase using Turbo DNA-free kit  
778 (Invitrogen, Carlsbad, CA, USA). RNA concentration was quantified using a Nanodrop  
779 DS-11 FX (Denovix, Wilmington, Delaware) and RNA integrity was assayed on 1%  
780 agarose gels. RNA was reverse transcribed into cDNA using a High Capacity cDNA  
781 Reverse Transcription Kit (Applied Biosystems). Semiquantitative RT-PCR analysis was  
782 performed using 1 µg of cDNA or gDNA (as positive control for amplification), 0.6 pmol  
783 of selected primer, the Phusion High-Fidelity DNA Polymerase (ThermoFisher  
784 Scientific, Waltham, MA, USA), and the following conditions: 98 °C for 15 min, followed  
785 by 35 cycles of 98 °C for 30 s, 60 °C for 30 s and 72 °C for 15 s. The *A. citrulli* *GADPH*  
786 housekeeping gene [68] was used as reference. The relative amount of amplified DNA  
787 was assayed on 2% agarose gels.

788

### 789 **RNA-Seq and quality analysis**

790 Total RNA of wild-type M6 and *hrpX* mutant strains was isolated as described  
791 above for RT-PCR experiments. Three independent RNA extractions were obtained for  
792 each strain. Ribosomal RNA was depleted using the MICROB Express Bacterial mRNA  
793 Purification kit (Ambion, Foster City, CA, USA). The integrity and quality of the  
794 ribosomal depleted RNA was checked by an Agilent 2100 Bioanalyzer chip-based  
795 capillary electrophoresis machine (Agilent Technologies, Santa Clara, CA, USA). RNA  
796 sequencing was carried out at the Center for Genomic Technologies at The Hebrew

797 University of Jerusalem (Jerusalem, Israel). The samples were used to generate whole  
798 transcriptome libraries using the NextSeq 500 high output kit (Illumina, San Diego, CA,  
799 USA) with a NextSeq 2000 sequencing instrument (Illumina). The cDNA libraries were  
800 quantified with a Qubit 2.0 Fluorometer (Invitrogen) and their quality was assessed with  
801 an Agilent 2200 TapeStation system (Agilent Technologies). One of the *hrpX* mutant  
802 libraries was removed from further analysis due to low quality. Raw reads (fastq files)  
803 were further inspected with FastQC v0.11.4 [69]. They were trimmed for quality and  
804 adaptor removal using Trim Galore default settings: trimming mode, single-end; Trim  
805 Galore version 0.4.3; Cutadapt version 1.12; Quality Phred score cutoff, 20; quality  
806 encoding type selected, ASCII+33; adapter sequence, AGATCGGAAGAGC (Illumina  
807 TruSeq, Sanger iPCR; auto-detected); maximum trimming error rate; 0.1; minimum  
808 required adapter overlap (stringency), 1 bp. An average of 0.6% of the reads were quality  
809 trimmed and 57% of the reads were treated for adaptor removal.

810

### 811 **Mapping of RNA-Seq reads on the *A. citrulli* M6 genome and differential expression** 812 **analysis**

813 Cleaned reads (~20 million per sample) were mapped against the latest version of  
814 the *A. citrulli* M6 genome (CP029373) using STAR v 2.201 [70]. Mapping files were  
815 further processed for visualization by Samtools Utilities v 0.1.19 [71]. The resulting Bam  
816 files were used to improve gene and operon predictions along the genome using cufflinks  
817 v2.2.1 followed by cuffmerge without a guiding reference file [72]. Uniquely mapped  
818 reads per gene were counted twice [once using the original submitted annotation file  
819 (orig.gff), and then using the merged annotations by cufflinks-cuffmerge (merged.gff)]  
820 using HTSeq-count [73]. Differential expression analysis was performed using the

821 DESeq2 R package [73]. Differentially expressed genes were defined as those genes with  
822 a fold-change higher than 2, and a *P* value lower than 0.05.

823

#### 824 **Validation of RNA-Seq results by quantitative real-time PCR (qRT-PCR)**

825 RNA-seq data were verified by qRT-PCR using specific primers of selected genes  
826 (S7 Table). Bacterial growth, RNA isolation and cDNA synthesis were as described  
827 above for RT-PCR and RNA-Seq experiments. qRT-PCR reactions were performed in a  
828 Light Cycler 480 II (Roche, Basel, Switzerland) using 1 µg of cDNA, 0.6 pmol of each  
829 primer and the HOT FIREPol EvaGreen qPCR Mix Plus (Solis BioDyne, Tartu, Estonia),  
830 and the following conditions: 95 °C for 15 min (1 cycle); 95 °C for 15 s, 60 °C for 20 s  
831 and 72 °C for 20 s (40 cycles); melting curve profile from 65 to 97 °C to verify the  
832 specificity of the reaction. The *A. citrulli GADPH* gene was used as an internal control to  
833 normalize gene expression. The threshold cycles (Ct) were determined with the Light  
834 Cycler 480 II software (Roche) and the fold-changes of three biological samples with  
835 three technical replicates per treatment were obtained by the  $\Delta\Delta\text{Ct}$  method [74].  
836 Significant differences in expression values were evaluated using the Mann-Whitney non-  
837 parametrical test ( $\alpha = 5\%$ ).

838

#### 839 **Additional bioinformatics tools**

840 BlastP analyses for search of T3E homologs were done at the NCBI server against  
841 the non-redundant protein sequences (nr) database, selecting the organisms *Acidovorax*  
842 (taxid: 12916), *Xanthomonas* (taxid: 338), *Ralstonia* (taxid: 48736) or *Pseudomonas*  
843 *syringae* group (taxid: 136849), with default parameters. Gene ontology (GO)  
844 assignments were done using Blast2GO software v5.2 (<https://www.blast2go.com/>).  
845 SignalP4.1 [75], Phobius [76] and Pred-Tat [77] were used for detection of N-terminal

846 type II secretion signal peptides. The program fuzznuc (EMBOSS package;  
847 <http://www.bioinformatics.nl/cgi-bin/emboss/fuzznuc>) was used to detect perfect PIP box  
848 sequences (TTCGB-N15-TTCGB; [32]) in the *A. citrulli* M6 genome. A logo of the PIP  
849 box motif of *A. citrulli* M6 was done with MEME-ChiP [78] at the MEME Suite website  
850 (<http://meme-suite.org/>). Domain search of T3Es was carried out using the following  
851 databases/tools: Protein Data Bank (PDB) and UniProtKB/Swiss-Prot (through NCBI  
852 Blast), PFAM (<https://pfam.xfam.org/>), Prosite (<https://prosite.expasy.org/>) and InterPro  
853 (<https://www.ebi.ac.uk/interpro/search/sequence-search>). LogSidDB [79] and Plant-  
854 mPLoc [80] were used for detection of protein localization signals and for prediction of  
855 subcellular localization of T3Es, respectively.

856

#### 857 **Translocation assays**

858 The ORFs without the stop codon of candidate genes were amplified using  
859 specific primers (S7 Table) and cloned into the *SalI/XbaI* sites of pBBR1MCS-  
860 2::*avrBs2*<sub>62-574</sub>, upstream to and in frame with the *avrBs2*<sub>62-574</sub> HR domain of *avrBs2* and  
861 an haemagglutinin (HA) tag [28], except for ORFs of genes *APS58\_0500* and  
862 *APS58\_1760*, which were cloned into the *XhoI/XbaI* sites of the same vector. The  
863 resulting plasmids were mobilized into *X. euvesicatoria* strains 85-10 *hrpG\**Δ*avrBs2* [81]  
864 and 85-10 *hrpG\**Δ*hrpF* [82]. Expression of recombinant T3E/CT3E-AvrBs2<sub>62-574</sub>-HA  
865 proteins was verified by Western blot using the iBlot Gel Transfer Stacks Nitrocellulose  
866 kit (Invitrogen), and anti- hemagglutinin (HA)-tag and horseradish peroxidase (HRP)  
867 antibodies (Cell Signaling Technology, Danvers, MA, USA) (S6 Fig). For translocation  
868 assays, *X. euvesicatoria* strains were grown overnight in LB broth with Km, centrifuged  
869 and resuspended in 10 mM MgCl<sub>2</sub> to a concentration of 10<sup>8</sup> cfu/mL. These suspensions  
870 were used to infiltrate the three youngest, fully expanded leaves of 5-week-old ECW20R

871 and ECW30R [83] pepper plants, carrying and lacking the *Bs2* gene, respectively, using  
872 a needleless syringe. The plants were kept in a growth chamber at 25 °C, ~50% relative  
873 humidity, 12 h day/12 h night. HR was monitored 36 h after inoculation (h.a.i.). For  
874 visualization of cell death, the infiltrated leaves were treated as described above for  
875 pepper leaves infiltrated with *A. citrulli* strains. Each candidate gene was tested in three  
876 independent experiments with at least three plants, with similar results being obtained  
877 among replicates and experiments.

878

### 879 ***Agrobacterium*-mediated transient expression and confocal imaging**

880 The ORFs of genes *APS58\_0500*, *APS58\_1448* and *APS58\_4116* were amplified  
881 with specific primers (S7 Table) and cloned into pEarlyGate101 binary vector [84],  
882 upstream of a Yellow Fluorescence Protein (YFP) encoding gene and an HA tag using  
883 the Gateway cloning system (ThermoFisher Scientific). The resulting plasmids were  
884 verified by sequencing and mobilized into *A. tumefaciens* GV3101 as indicated above.  
885 Transient expression experiments were performed following the protocol described by  
886 Roden *et al.* [81] with few modifications. Briefly, overnight cultures of *A. tumefaciens*  
887 GV3101 carrying the different plasmids were centrifuged, and pellets were resuspended  
888 in induction solution containing 10 mM MgCl<sub>2</sub>, 10 mM 2-(N-morpholino)-ethanesulfonic  
889 acid (MES), and 200 mM acetosyringone (pH 5.6). The suspensions were incubated at 25  
890 °C without shaking for 3 h. Bacterial cultures were then diluted to OD<sub>600nm</sub>~0.6 and  
891 infiltrated with a needleless syringe into leaves of 4-week-old *N. benthamiana* plants [85]  
892 that were grown in a growth chamber (16 h/26 °C in the light, 8 h/18 °C in the dark;  
893 relative humidity set to 70%). Subcellular localization of tested T3Es coupled to YFP  
894 were investigated by co-infiltration with *A. tumefaciens* GV3101 carrying monomeric  
895 Red Fluorescence Protein fused in frame with the endoplasmid reticulum (ER) marker

896 HDEL (mRFP-HDEL; [86, 87]), the membrane associated SIDRP2A (L. Pizarro and M.  
897 Bar, unpublished results) fused to monomeric Cherry fluorescent protein, and by staining  
898 with 1 mg/mL 4',6-diamidino-2-phenylindole (DAPI), that was used to detect the nucleus  
899 of the plant cells [88]. As controls, plants were infiltrated with *A. tumefaciens* GV3101  
900 carrying pEarlyGate104 (YFP-encoding gene). Infiltrated plants were kept in the growth  
901 chamber at similar conditions as above, and 48 h.a.i., functional fluorophores were  
902 visualized using a SPE (Leica Microsystems, Wetzlar, Germany) or a LSM 780 (Zeiss,  
903 Oberkochen, Germany) confocal microscope. Images were acquired using two tracks:  
904 track 1 for YFP detection, exciting at 514 nm and collecting emission from the emission  
905 range 530-560 nm; track 2 for RFP and mCherry detection, exciting at 561 nm and  
906 collecting from the emission range 588-641 nm. Images of 8 bits and 1024X1024 pixels  
907 were acquired using a pixel dwell time of 1.27, pixel averaging of 4 and pinhole of 1 airy  
908 unit. Analysis of colocalization was conducted with Fiji-ImageJ using the Coloc2 tool.  
909 For calculating the Pearson correlation coefficient, 15-18 images were analysed. Signal  
910 profiles were analysed using the Plot Profile tool [89].

911

## 912 **Acknowledgements**

913 We thank Dr. Einat Zelinger from the Interdepartmental Core Facility of the  
914 Robert H. Smith Faculty of Agriculture, Food and Environment Hebrew University  
915 Interdepartmental Core Facility for her assistance with confocal microscopy. We also  
916 thank Dr. Inbar Plaschkes from the Bioinformatics Unit of the Hebrew University of  
917 Jerusalem for her assistance with the RNA-Seq data.

918

## 919 **References**

- 920 1. Rosenberg T, Eckshtain-Levi N, Burdman S. Plant pathogenic *Acidovorax* species.  
921 In: Murillo J, Jackson R, Vinatzer B, Arnold D, editors. Bacterial-plant interactions:  
922 advanced research and future trends. Poole: Caister Academic Press; 2015. pp 83-99.
- 923 2. Burdman S, Walcott R. Plant-pathogenic *Acidovorax* species. Saint Paul: American  
924 Phytopathological Society; 2018
- 925 3. Burdman S, Walcott R. *Acidovorax citrulli*: generating basic and applied knowledge  
926 to tackle a global threat to the cucurbit industry. *Mol Plant Pathol.* 2012; 13:805-815.
- 927 4. Zhao M, Walcott R. *Acidovorax citrulli*: History, epidemiology, and management of  
928 bacterial fruit blotch of cucurbits. In: Burdman S, Walcott R., editors. Plant-  
929 pathogenic *Acidovorax* species. Saint Paul: American Phytopathological Society;  
930 2018. pp. 39-57.
- 931 5. Burdman S, Kots N, Kritzman G, Kopelowitz, J. Molecular, physiological, and host-  
932 range characterization of *Acidovorax avenae* subsp. *citrulli* isolates from watermelon  
933 and melon in Israel. *Plant Dis.* 2005; 89:1339-1347.
- 934 6. Walcott RR, Fessehaie A, Castro AC. Differences in pathogenicity between two  
935 genetically distinct groups of *Acidovorax avenae* subsp. *citrulli* on cucurbit hosts. *J*  
936 *Phytopathol.* 2004; 152:277-285.
- 937 7. Walcott RR, Langston JDB, Sanders FH, Gitaitis RD. Investigating intraspecific  
938 variation of *Acidovorax avenae* subsp. *citrulli* using DNA fingerprinting and whole  
939 cell fatty acid analysis. *Phytopathology.* 2000; 90:191-196.
- 940 8. Eckshtain-Levi N, Shkedy D, Gershovitz M, da Silva GM, Tamir-Ariel D, Walcott  
941 R, et al. Insights from the genome sequence of *Acidovorax citrulli* M6, a group I  
942 strain of the causal agent of bacterial fruit blotch of cucurbits. *Front Microbiol.* 2016;  
943 7:430.



- 944 **9.** Yang R, Santos-Garcia D, Pérez-Montaña F, da Silva GM, Zhao M, Jiménez-  
945 Guerrero I, et al. Complete assembly of the genome of an *Acidovorax citrulli* strain  
946 reveals a naturally occurring plasmid in this species. *Front Microbiol.* Forthcoming  
947 (doi: 10.3389/fmicb.2019.01400).
- 948 **10.** Bahar O, Burdman S. Bacterial fruit blotch: a threat to the cucurbit industry. *Israel J*  
949 *Plant Sci.* 2010; 58:19-31.
- 950 **11.** Block A, Li GY, Fu ZQ, Alfano JR. Phytopathogen type III effector weaponry and  
951 their plant targets. *Curr Opin Plant Biol.* 2008; 11:396-403.
- 952 **12.** Büttner D. Behind the lines-actions of bacterial type III effector proteins in plant  
953 cells. *FEMS Microbiol Rev.* 2016; 40:894-937.
- 954 **13.** Galan JE, Lara-Tejero M, Marlovits TC, Wagner S. Bacterial type III secretion  
955 systems: specialized nanomachines for protein delivery into target cells. *Ann Rev*  
956 *Microbiol.* 2014; 68:415-438.
- 957 **14.** Feng F, Zhou JM. Plant-bacterial pathogen interactions mediated by type III  
958 effectors. *Curr Opin Plant Biol.* 2012; 15:469-476.
- 959 **15.** Macho AP, Zipfel C. Targeting of plant pattern recognition receptor-triggered  
960 immunity by bacterial type-III secretion system effectors. *Curr Opin Microbiol.*  
961 2015; 23: 14-22.
- 962 **16.** Duxbury Z, Ma Y, Furzer OJ, Huh SU, Cevik V, Jones, JDG, et al. Pathogen  
963 perception by NLRs in plants and animals: Parallel worlds. *Bioessays.* 2016; 38:769-  
964 781.
- 965 **17.** Jones JD, Dangl JL. The plant immune system. *Nature.* 2006; 444:323-329.
- 966 **18.** Flor HH. Current status of the gene-for-gene concept. *Ann Rev Phytopathol.* 1971;  
967 9:275-296.

- 968 **19.** Bogdanove AJ, Beer SV, Bonas U, Boucher CA, Collmer A, Coplin DL, et al.  
969 Unified nomenclature for broadly conserved *hrp* genes of phytopathogenic bacteria.  
970 Mol Microbiol. 1996; 20:681-683.
- 971 **20.** Büttner D, Bonas U. Getting across-bacterial type III effector proteins on their way  
972 to the plant cell. EMBO J. 2002; 21:5313-5322.
- 973 **21.** Büttner D, Bonas U. Regulation and secretion of *Xanthomonas* virulence factors.  
974 FEMS Microbiol Rev. 2010; 34:107-133.
- 975 **22.** Genin S, Denny TP. Pathogenomics of the *Ralstonia solanacearum* species complex.  
976 Annu Rev Phytopathol. 2012; 50:67-89.
- 977 **23.** Wengelnik K, Ackerveken G, Bonas U. HrpG, a key *hrp* regulatory protein of  
978 *Xanthomonas campestris* pv. *vesicatoria* is homologous to two-component response  
979 regulators. Mol Plant-Microbe Interact. 1996; 196:704-712.
- 980 **24.** Wengelnik K, Bonas U. HrpXv, an AraC-type regulator, activates expression of five  
981 of the six loci in the *hrp* cluster of *Xanthomonas campestris* pv. *vesicatoria*. J  
982 Bacteriol. 1996; 178:3462-3469.
- 983 **25.** Cunnac S, Boucher C, Genin S. Characterization of the *cis*-acting regulatory element  
984 controlling HrpB-mediated activation of the type III secretion system and effector  
985 genes in *Ralstonia solanacearum*. J Bacteriol. 2004; 186:2309-2318.
- 986 **26.** Zhang XX, Zhao M, Yan JP, Yang LL, Yang YW, Guan W., et al. Involvement of  
987 *hrpX* and *hrpG* in the virulence of *Acidovorax citrulli* strain Aac5, causal agent of  
988 bacterial fruit blotch in cucurbits. Front Microbiol. 2018; 9:507.
- 989 **27.** Eckshtain-Levi N, Munitz T, Zivanovic M, Traore SM, Sproeer C, Zhao B, et al.  
990 Comparative analysis of type III secreted effector genes reflects divergence of  
991 *Acidovorax citrulli* strains into three distinct lineages. Phytopathology. 2014;  
992 104:1152-1162.

- 993 **28.** Teper D, Burstein D, Salomon D, Gershovitz M, Pupko T, Sessa G. Identification of  
994 novel *Xanthomonas euvesicatoria* type III effector proteins by a machine-learning  
995 approach. *Mol Plant Pathol.* 2016; 17:398-411.
- 996 **29.** Nissan G, Gershovits M, Morozov M, Chalupowicz L, Sessa G, Manulis-Sasson S,  
997 et al. Revealing the inventory of type III effectors in *Pantoea agglomerans* gall-  
998 forming pathovars using draft genome sequences and a machine-learning approach.  
999 *Mol Plant Pathol.* 2018; 19:381-392.
- 1000 **30.** De Vos P, Willems A, Jones JB. Taxonomy of the *Acidovorax* genus. In: Burdman  
1001 S, Walcott R., editors. *Plant-pathogenic Acidovorax species*. Saint Paul: American  
1002 Phytopathological Society; 2018. pp. 5-37.
- 1003 **31.** Wengelnik K, Marie C, Russel M, Bonas U. Expression and localization of HrpA1,  
1004 a protein of *Xanthomonas campestris* pv. *vesicatoria* essential for pathogenicity and  
1005 induction of the hypersensitive reaction. *J Bacteriol.* 1996; 178:1061-1069.
- 1006 **32.** Koebnik R, Krüger A, Thieme F, Urban A, Bonas U. Specific binding of the  
1007 *Xanthomonas campestris* pv. *vesicatoria* AraC-type transcriptional activator HrpX  
1008 to plant-inducible promoter boxes. *J Bacteriol.* 2006; 188:7652-7660.
- 1009 **33.** Tai TH, Dahlbeck D, Clark ET, Gajiwala P, Pasion R, Whalen MC, et al. Expression  
1010 of the *Bs2* pepper gene confers resistance to bacterial spot disease in tomato. *Proc*  
1011 *Natl Acad Sci USA.* 1999; 96:14153-14158.
- 1012 **34.** Roden JA, Belt B, Ross JB, Tachibana T, Vargas J, Mudgett MB. A genetic screen  
1013 to isolate type III effectors translocated into pepper cells during *Xanthomonas*  
1014 infection. *Proc Natl Acad Sci USA.* 2004; 101:16624-16629.
- 1015 **35.** Li R, Liu P, Wan Y, Chen T, Wang Q, Mettbach U, et al. A membrane microdomain-  
1016 associated protein, Arabidopsis Flot1, is involved in a clathrin-independent endocytic  
1017 pathway and is required for seedling development. *Plant Cell.* 2012; 24:2105-2122.

- 1018 **36.** Alfano JR, Collmer A. Type III secretion system effector proteins: double agents in  
1019 bacterial disease and plant disease. *Annu Rev Phytopathol* 2004; 42:385-414.
- 1020 **37.** Boller T, He SY. Innate immunity in plants: an arms race between pattern recognition  
1021 receptors in plants and effectors in microbial pathogens. *Science*. 2009; 324:742-744.
- 1022 **38.** Castiblanco LF, Triplett LR, Sundin GW. Regulation of effector delivery by type III  
1023 secretion chaperone proteins in *Erwinia amylovora*. *Front Microbiol*. 2018; 9:146.
- 1024 **39.** Kim HS, Thammarat P, Lommel SA, Hogan CS, Charkowski AO. *Pectobacterium*  
1025 *carotovorum* elicits plant cell death with DspE/F, but does not suppress callose or  
1026 induce expression of plant genes early in plant-microbe interactions. *Mol Plant-*  
1027 *Microbe Interact*. 2011; 24:773–786.
- 1028 **40.** Chang JH, Urbach JM, Law TF, Arnold LW, Hu A, Gombar S, et al. A high-  
1029 throughput, near-saturating screen for type III effector genes from *Pseudomonas*  
1030 *syringae*. *Proc Natl Acad Sci USA*. 2005; 102:2549-2554.
- 1031 **41.** Kvitko BH, Park DH, Velasquez AC, Wei CF, Russell AB, Martin GB, et al.  
1032 Deletions in the repertoire of *Pseudomonas syringae* pv. *tomato* DC3000 type III  
1033 secretion effector genes reveal functional overlap among effectors. *PLoS Pathog*.  
1034 2009; 5:e1000388.
- 1035 **42.** O'Brien HE, Thakur S and Guttman DS. (2011) Evolution of plant pathogenesis in  
1036 *Pseudomonas syringae*: a genomics perspective. *Ann Rev Phytopathol*. 2011;  
1037 49:269-289.
- 1038 **43.** Schechter LM, Vencato M, Jordan KL, Schneider SE, Schneider DJ, Collmer A.  
1039 Multiple approaches to a complete inventory of *Pseudomonas syringae* pv. *tomato*  
1040 DC3000 type III secretion system effector proteins. *Mol Plant-Microbe Interact*.  
1041 2006; 19:1180-1192.

- 1042 **44.** White FF, Potnis N, Jones JB, Koebnik R. The type III effectors of *Xanthomonas*.  
1043 Mol Plant Pathol. 2009; 10:749-766.
- 1044 **45.** Deslandes L, Genin S. (2014) Opening the *Ralstonia solanacearum* type III effector  
1045 tool box: insights into host cell subversion mechanisms. Curr Opin Plant Biol. 2014;  
1046 20:110-117.
- 1047 **46.** Peeters N, Carrère S, Anisimova M, Plener L, Cazalé AC, Genin S. Répertoire,  
1048 unified nomenclature and evolution of the type III effector gene set in the *Ralstonia*  
1049 *solanacearum* species complex. BMC Genomics. 2013; 14:859.
- 1050 **47.** Guo Y, Figueiredo F, Jones J, Wang N. HrpG and HrpX play global roles in  
1051 coordinating different virulent traits of *Xanthomonas axonopodis* pv. *citri*. Mol Plant-  
1052 Microbe Interact. 2011; 24:649-661.
- 1053 **48.** Occhialini A, Cunnac S, Reymond N, Genin S, Boucher C. Genome-wide analysis  
1054 of gene expression in *Ralstonia solanacearum* reveals that the *hrpB* gene acts as a  
1055 regulatory switch controlling multiple virulence pathways. Mol. Plant-Microbe  
1056 Interact. 2005; 18:938-949.
- 1057 **49.** Valls M, Genin S, Boucher C. Integrated regulation of the type III secretion system  
1058 and other virulence determinants in *Ralstonia solanacearum*. PLoS Pathog. 2006;  
1059 2:e82.
- 1060 **50.** Brito B, Marena M, Barberis P, Boucher C, Genin S. *prhJ* and *hrpG*, two new  
1061 components of the plant-signal dependent regulatory cascade controlled by PrhA in  
1062 *Ralstonia solanacearum*. Mol Microbiol. 1999; 31:237-251.
- 1063 **51.** Furutani A, Tsuge S, Ohnishi K, Hikichi Y, Oku T, Tsuno K, et al. Evidence for  
1064 HrpXo-dependent expression of type II secretory proteins in *Xanthomonas oryzae*  
1065 pv. *oryzae*. J Bacteriol. 2004; 186:1374-1380.

- 1066 **52.** Szczesny R, Jordan M, Schramm C, Schulz S, Cogež V, Bonas U, et al. Functional  
1067 characterization of the Xcs and Xps type II secretion systems from the plant  
1068 pathogenic bacterium *Xanthomonas campestris* pv. *vesicatoria*. *New Phytol.* 2010;  
1069 187:983-1002.
- 1070 **53.** Wang L, Rong W, He C. Two *Xanthomonas* extracellular polygalacturonases,  
1071 PghAxc and PghBxc, are regulated by type III secretion regulators HrpX and HrpG  
1072 and are required for virulence. *Mol Plant-Microbe Interact.* 2008; 21:555-563.
- 1073 **54.** Yamazaki A, Hirata A, Tsuyumu S. HrpG regulates type II secretory proteins in  
1074 *Xanthomonas axonopodis* pv. *citri*. *J Gen Plant Pathol.* 2008; 74:138-150.
- 1075 **55.** Sambrook J, Fritsch EF, Maniatis T. *Molecular cloning: a laboratory manual.* Cold  
1076 Spring Harbor: Cold Spring Harbor Laboratory; 1989.
- 1077 **56.** Bahar O, Goffer T, Burdman S. Type IV pili are required for virulence, twitching  
1078 motility, and biofilm formation of *Acidovorax avenae* subsp. *citrulli*. *Mol Plant-*  
1079 *Microbe Interact.* 2009; 22:909-920.
- 1080 **57.** Zhou H, Morgan RL, Guttman DS, Ma W. Allelic variants of the *Pseudomonas*  
1081 *syringae* type III effector HopZ1 are differentially recognized by plant resistance  
1082 systems. *Mol Plant-Microbe Interact.* 2009; 22:176-189.
- 1083 **58.** Burstein D, Zusman T, Degtyar E, Viner R, Segal G, Pupko T. Genome-scale  
1084 identification of *Legionella pneumophila* effectors using a machine learning  
1085 approach. *PLoS Pathog.* 2009; 5:e1000508.
- 1086 **59.** Lifshitz Z, Burstein D, Schwartz K, Shuman HA, Pupko T, Segal G. Identification  
1087 of novel *Coxiella burnetii* Icm/Dot effectors and genetic analysis of their  
1088 involvement in modulating a mitogen-activated protein kinase pathway. *Infect*  
1089 *Immun.* 2014; 82:3740-3752.
- 1090 **60.** Breiman L. Random forest. *Mach Learn.* 2001; 45:5-32.

- 1091 **61.** Langley P, Iba W, Thompson K. An analysis of Bayesian classifiers. In: Aaai-92,  
1092 Proceedings of the tenth national conference on artificial intelligence. San Jose:  
1093 AAAI Press; 1992. pp. 223-238.
- 1094 **62.** Burges CJC. A tutorial on support vector machines for pattern recognition. *Data Min*  
1095 *Knowl Discov.* 1998; 2:121-167.
- 1096 **63.** Hastie T, Tibshirani R, Friedman J. The elements of statistical learning. New York:  
1097 Springer; 2001
- 1098 **64.** Pedregosa F, Varoquaux G, Gramfort A, Michel V, Thirion B, Grisel O, et al. Scikit-  
1099 learn: machine learning in Python. *J Mach Learn Res.* 2011; 12:2825-2830.
- 1100 **65.** Penfold RJ, Pemberton JM. An improved suicide vector for construction of  
1101 chromosomal insertion mutations in bacteria. *Gene.* 1992; 118:145-146.
- 1102 **66.** Kovach ME, Elzer PH, Hill DS, Robertson GT, Farris MA, Roop RM, et al. Four  
1103 new derivatives of the broad-host-range cloning vector pBBR1MCS, carrying  
1104 different antibiotic-resistance cassettes. *Gene.* 1995; 166:175-176.
- 1105 **67.** Kearney B, Staskawicz BJ. Widespread distribution and fitness contribution of  
1106 *Xanthomonas campestris* avirulence gene *avrBs2*. *Nature.* 1990; 346:385-386.
- 1107 **68.** Shavit R, Lebediker M, Pasternak Z, Burdman S, Helman Y. The *vapB-vapC*  
1108 operon of *Acidovorax citrulli* functions as a *bona-fide* toxin-antitoxin module. *Front*  
1109 *Microbiol.* 2016; 6:1499.
- 1110 **69.** Martin M. Cutadapt removes adapter sequences from high-throughput sequencing  
1111 reads. *EMBnet J.* 2011; 17:10.
- 1112 **70.** Dobin A, Davis CA, Schlesinger F, Drenkow J, Zaleski C, Jha S, et al. STAR:  
1113 ultrafast universal RNA-seq aligner. *Bioinformatics.* 2013; 29:15-21.
- 1114 **71.** Li H, Handsaker B, Wysoker A, Fennell T, Ruan J, Homer N, et al. The sequence  
1115 alignment/map format and SAMtools. *Bioinformatics.* 2009; 25:2078-2079.

- 1116 **72.** Trapnell C, Williams BA, Pertea G, Mortazavi A, Kwan G, Van Baren M, et al.  
1117 Transcript assembly and quantification by RNA-Seq reveals unannotated transcripts  
1118 and isoform switching during cell differentiation. *Nat Biotechnol.* 2010; 28:511-515.
- 1119 **73.** Anders S, Huber W. Differential expression analysis for sequence count data.  
1120 *Genome Biol.* 2010; 11:R106.
- 1121 **74.** Pfaffl MW. A new mathematical model for relative quantification in real-time RT-  
1122 PCR. *Nucleic Acids Res.* 2001; 29:e45.
- 1123 **75.** Petersen N, Brunak S, von Heijne G, Nielsen H. SignalP 4.0: discriminating signal  
1124 peptides from transmembrane regions. *Nat Methods.* 2011; 8:785-786.
- 1125 **76.** Käll L, Krogh A, Sonnhammer ELL. Advantages of combined transmembrane  
1126 topology and signal peptide prediction - the Phobius web server. *Nucleic Acids Res.*  
1127 2007; 35:W429-432.
- 1128 **77.** Bagos PG, Nikolaou EP, Liakopoulos TD, Tsirigos KD. Combined prediction of Tat  
1129 and Sec signal peptides with Hidden Markov Models. *Bioinformatics.* 2010;  
1130 26:2811-2817.
- 1131 **78.** Machanick P, Bailey TL. MEME-ChiP: motif analysis of large DNA datasets.  
1132 *Bioinformatics.* 2011; 27:1696-1697.
- 1133 **79.** Negi S, Pandey S, Srinivasan SM, Mohammed A, Guda C. LogSigDB: a database of  
1134 protein localization signals. *Database.* 2015; bav003 (doi:10.1093/database/bav003).
- 1135 **80.** Chou KC, Shen HB. Cell-PLoc: A package of web-servers for predicting subcellular  
1136 localization of proteins in various organisms. *Nat Protoc.* 2008; 8:135-162.
- 1137 **81.** Roden J Eardley L, Hotson A, Cao Y, Mudgett MB. Characterization of the  
1138 *Xanthomonas* AvrXv4 effector, a SUMO protease translocated into plant cells. *Mol.*  
1139 *Plant-Microbe Interact.* 2004; 17:633-643.



- 1140 **82.** Casper-Lindley C, Dahlbeck D, Clark ET, Staskawicz BJ. Direct biochemical  
1141 evidence for type III secretion-dependent translocation of the AvrBs2 effector protein  
1142 into plant cells. *Proc Natl Acad Sci USA*. 2002; 99:8336-8341.
- 1143 **83.** Minsavage GV, Dahlbeck D, Morales CQ, Whalen MC, Kearny B, Bonas U, et al.  
1144 Gene-for-gene relationships specifying disease resistance in *Xanthomonas*  
1145 *campestris* pv. *vesicatoria*-pepper interactions. *Mol Plant-Microbe Interact*. 1990;  
1146 3:41-47.
- 1147 **84.** Earley KW, Haag JR, Pontes O, Opper K, Juehne T, Song K, et al. Gateway-  
1148 compatible vectors for plant functional genomics and proteomics. *Plant J*. 2006;  
1149 45:616-629.
- 1150 **85.** Goodin MM, Zaitlin D, Naidu RA, Lommel SA. *Nicotiana benthamiana*: its history  
1151 and future as a model for plant-pathogen interactions. *Mol Plant-Microbe Interact*.  
1152 2008; 21:1015-1026.
- 1153 **86.** Runions J, Brach T, Kühner S, Hawes C. Photoactivation of GFP reveals protein  
1154 dynamics within the endoplasmic reticulum membrane. *J Exp Bot*. 2006; 57:43-50.
- 1155 **87.** Schoberer J, Vavra U, Stadlmann J, Hawes C, Mach L, Steinkellner H, et al.  
1156 Arginine/lysine residues in the cytoplasmic tail promote ER export of plant  
1157 glycosylation enzymes. *Traffic*. 2009; 10:101-115.
- 1158 **88.** Kapuscinski J, Skoczylas B. Simple and rapid fluorimetric method for DNA  
1159 microassay. *Anal Biochem*. 1977; 83:252-257.
- 1160 **89.** Schindelin J, Arganda-Carreras I, Frise E, Kaynig V, Longair M, Pietzsch T, et al.  
1161 Fiji: an open-source platform for biological-image analysis. *Nat Methods*. 2012;  
1162 9:676-682.

1163

1164 **Supporting information**

1165 **S1 Fig. HrpX and HrpG are required for pathogenicity of *Acidovorax citrulli* M6.**

1166 Lesions induced in a melon (cv. HA61428) leaf syringe-infiltrated with  $10^8$  cfu/mL  
1167 suspensions of wild-type M6, but not of M6 mutants defective in *hrpX* and *hrpG* genes.

1168 Partial restoration of the wild-type phenotype was observed following transformation of  
1169 the mutants with plasmids pBBR1MCS-5::*hrpX* and pBBR1MCS-5::*hrpG*  
1170 (complementation plasmids), respectively. The picture was taken 3 days after infiltration.

1171 **S2 Fig. Subcellular localization of APS\_0500.** (A) Confocal microscopy images of *N.*

1172 *benthamiana* epidermal cells transiently expressing APS\_0500-YFP and different  
1173 endomembrane compartment markers as indicated. Representative images show

1174 APS\_0500-YFP (green), the subcellular marker: HDEL-RFP, Free-mCherry or SIDRP2A  
1175 (magenta) and the superimposed image of both channels (merge). Pearson correlation

1176 coefficient of the co-localization between APS\_0500-YFP and the markers (N=15-18)  
1177 was determined using the Coloc2 function from ImageJ. Data represented as mean  $\pm$

1178 SEM. (B) Confocal microscopy images of *N. benthamiana* epidermal cells transiently

1179 expressing the plasma membrane protein Flot1-GFP and Free-mCherry. All the images  
1180 were acquired 48 h after *A. tumefaciens* infiltration using Zeiss LSM780 (40x/1,2 W

1181 Korr). Scale bar 20  $\mu$ m.

1182 **S3 Fig. Subcellular localization of APS\_1448.** Confocal microscopy images of *N.*

1183 *benthamiana* epidermal cells transiently expressing APS\_1448-YFP and different  
1184 endomembrane compartment markers as indicated. Representative images show

1185 APS\_1448-YFP (green), the subcellular markers HDEL-RFP, Free-mCherry or  
1186 SIDRP2A (magenta), and the superimposed image of both channels (merge). Pearson

1187 correlation coefficient of the co-localization between APS\_1448-YFP and the markers  
1188 (N=15–18) was determined using the Coloc2 function from ImageJ. Data represented as

1189 mean  $\pm$  SEM. All the images were acquired 48 h after *A. tumefaciens* infiltration using  
1190 Zeiss LSM780 (40x/1,2 W Korr). Scale bar, 20  $\mu$ m.

1191 **S4 Fig. Subcellular localization of APS\_4116.** Confocal microscopy images of *N.*  
1192 *benthamiana* epidermal cells transiently expressing APS\_1448-YFP and different  
1193 endomembrane compartment markers as indicated. Representative images show  
1194 APS\_1448-YFP (green), the subcellular markers HDEL-RFP, Free-mCherry or  
1195 SIDRP2A (magenta), and the superimposed image of both channels (merge). Pearson  
1196 correlation coefficient of the co-localization between APS\_1448-YFP and the markers  
1197 (N=15–18) was determined using the Coloc2 function from ImageJ. Data represented as  
1198 mean  $\pm$  SEM. All the images were acquired 48 h after *A. tumefaciens* infiltration using  
1199 Zeiss LSM780 (40x/1,2 W Korr). Scale bar, 20  $\mu$ m.

1200 **S5 Fig. Distribution of *Acidovorax citrulli* M6 type III effectors (T3Es) according to**  
1201 **their amino acid length.** The data are from the annotation (GenBank accession  
1202 CP029373) of the *A. citrulli* M6 ORFs.

1203 **S6 Fig. Expression of effector-AvrBs<sub>262-574</sub>::HA fusion proteins of T3Es that were**  
1204 **tested in translocation assays.** Total protein was extracted from overnight cultures of  
1205 *Xanthomonas euvesicatoria* 85-10-*hrpG*\*- $\Delta$ *avrBs2* expressing CT3E-AvrBs<sub>262-574</sub>-HA  
1206 fusions in plasmid pBBR1MCS-2::*avrBs2*<sub>62-574</sub>. Proteins were analysed by Western blot  
1207 using HA-tag antibody. XopS (*X. euvesicatoria* effector)-AvrBs<sub>262-574</sub>::HA was included  
1208 as positive control. Asterisks indicate the size of the expected bands.

1209 **S1 Table.** Ranking and prediction scores of open reading frames of *Acidovorax citrulli*  
1210 AAC00-1 (GenBank accession CP000512.1) in the first machine learning run.

1211 **S2 Table.** Occurrence of *Acidovorax citrulli* M6 type III effectors in other plant  
1212 pathogenic *Acidovorax* species.

1213 **S3 Table.** Differential gene expression as determined by RNA-Seq between *Acidovorax*  
1214 *citrulli* M6 and an M6 mutant strain defective in *hrpX* gene, after 72 h of growth in XVM2  
1215 minimal medium at 28 °C.

1216 **S4 Table.** Perfect plant-inducible promoter (PIP) boxes in the *Acidovorax citrulli* M6  
1217 genome.

1218 **S5 Table.** Ranking and prediction scores of open reading frames of *Acidovorax citrulli*  
1219 M6 (GenBank accession CP029373) in the second machine learning run.

1220 **S6 Table.** Bacterial strains and plasmids used in this study.

1221 **S7 Table.** DNA oligonucleotide primers used in this study.

1222 **S8 Table.** List and description of the features used for the first and second machine  
1223 learning runs.

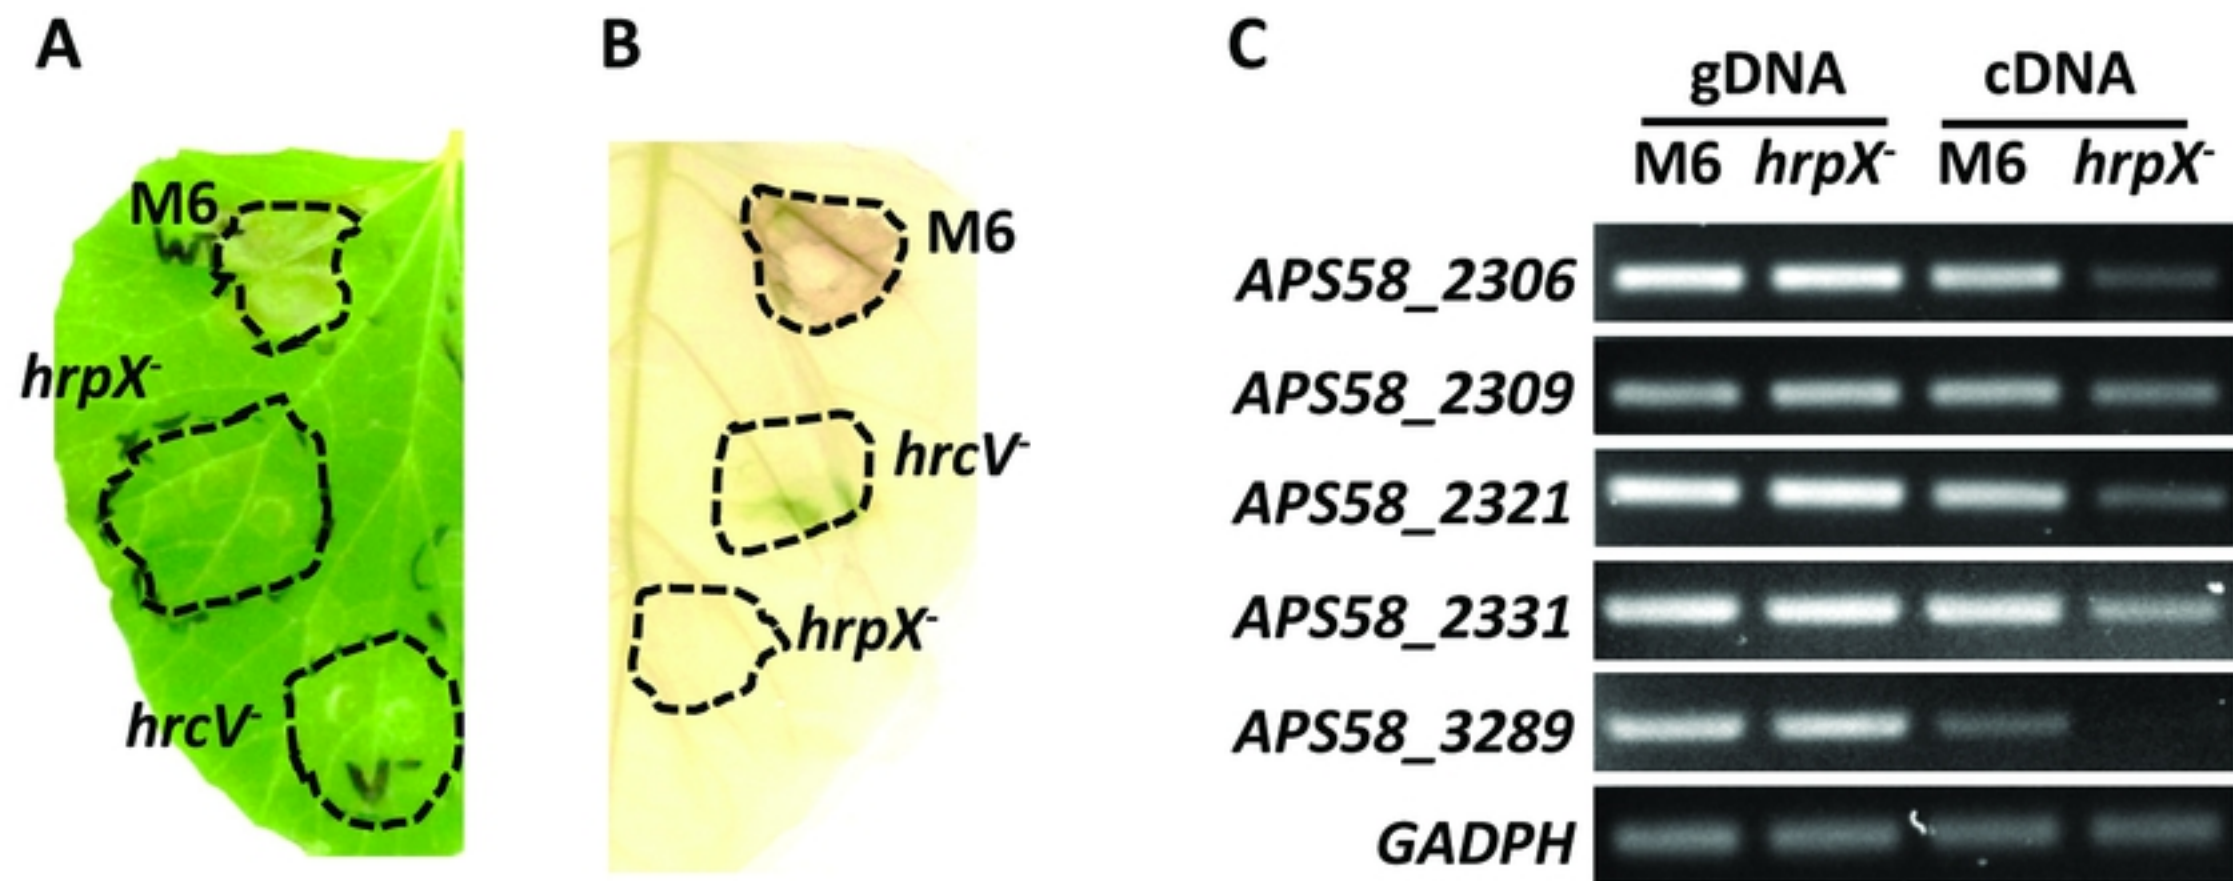

Figure 1

**A**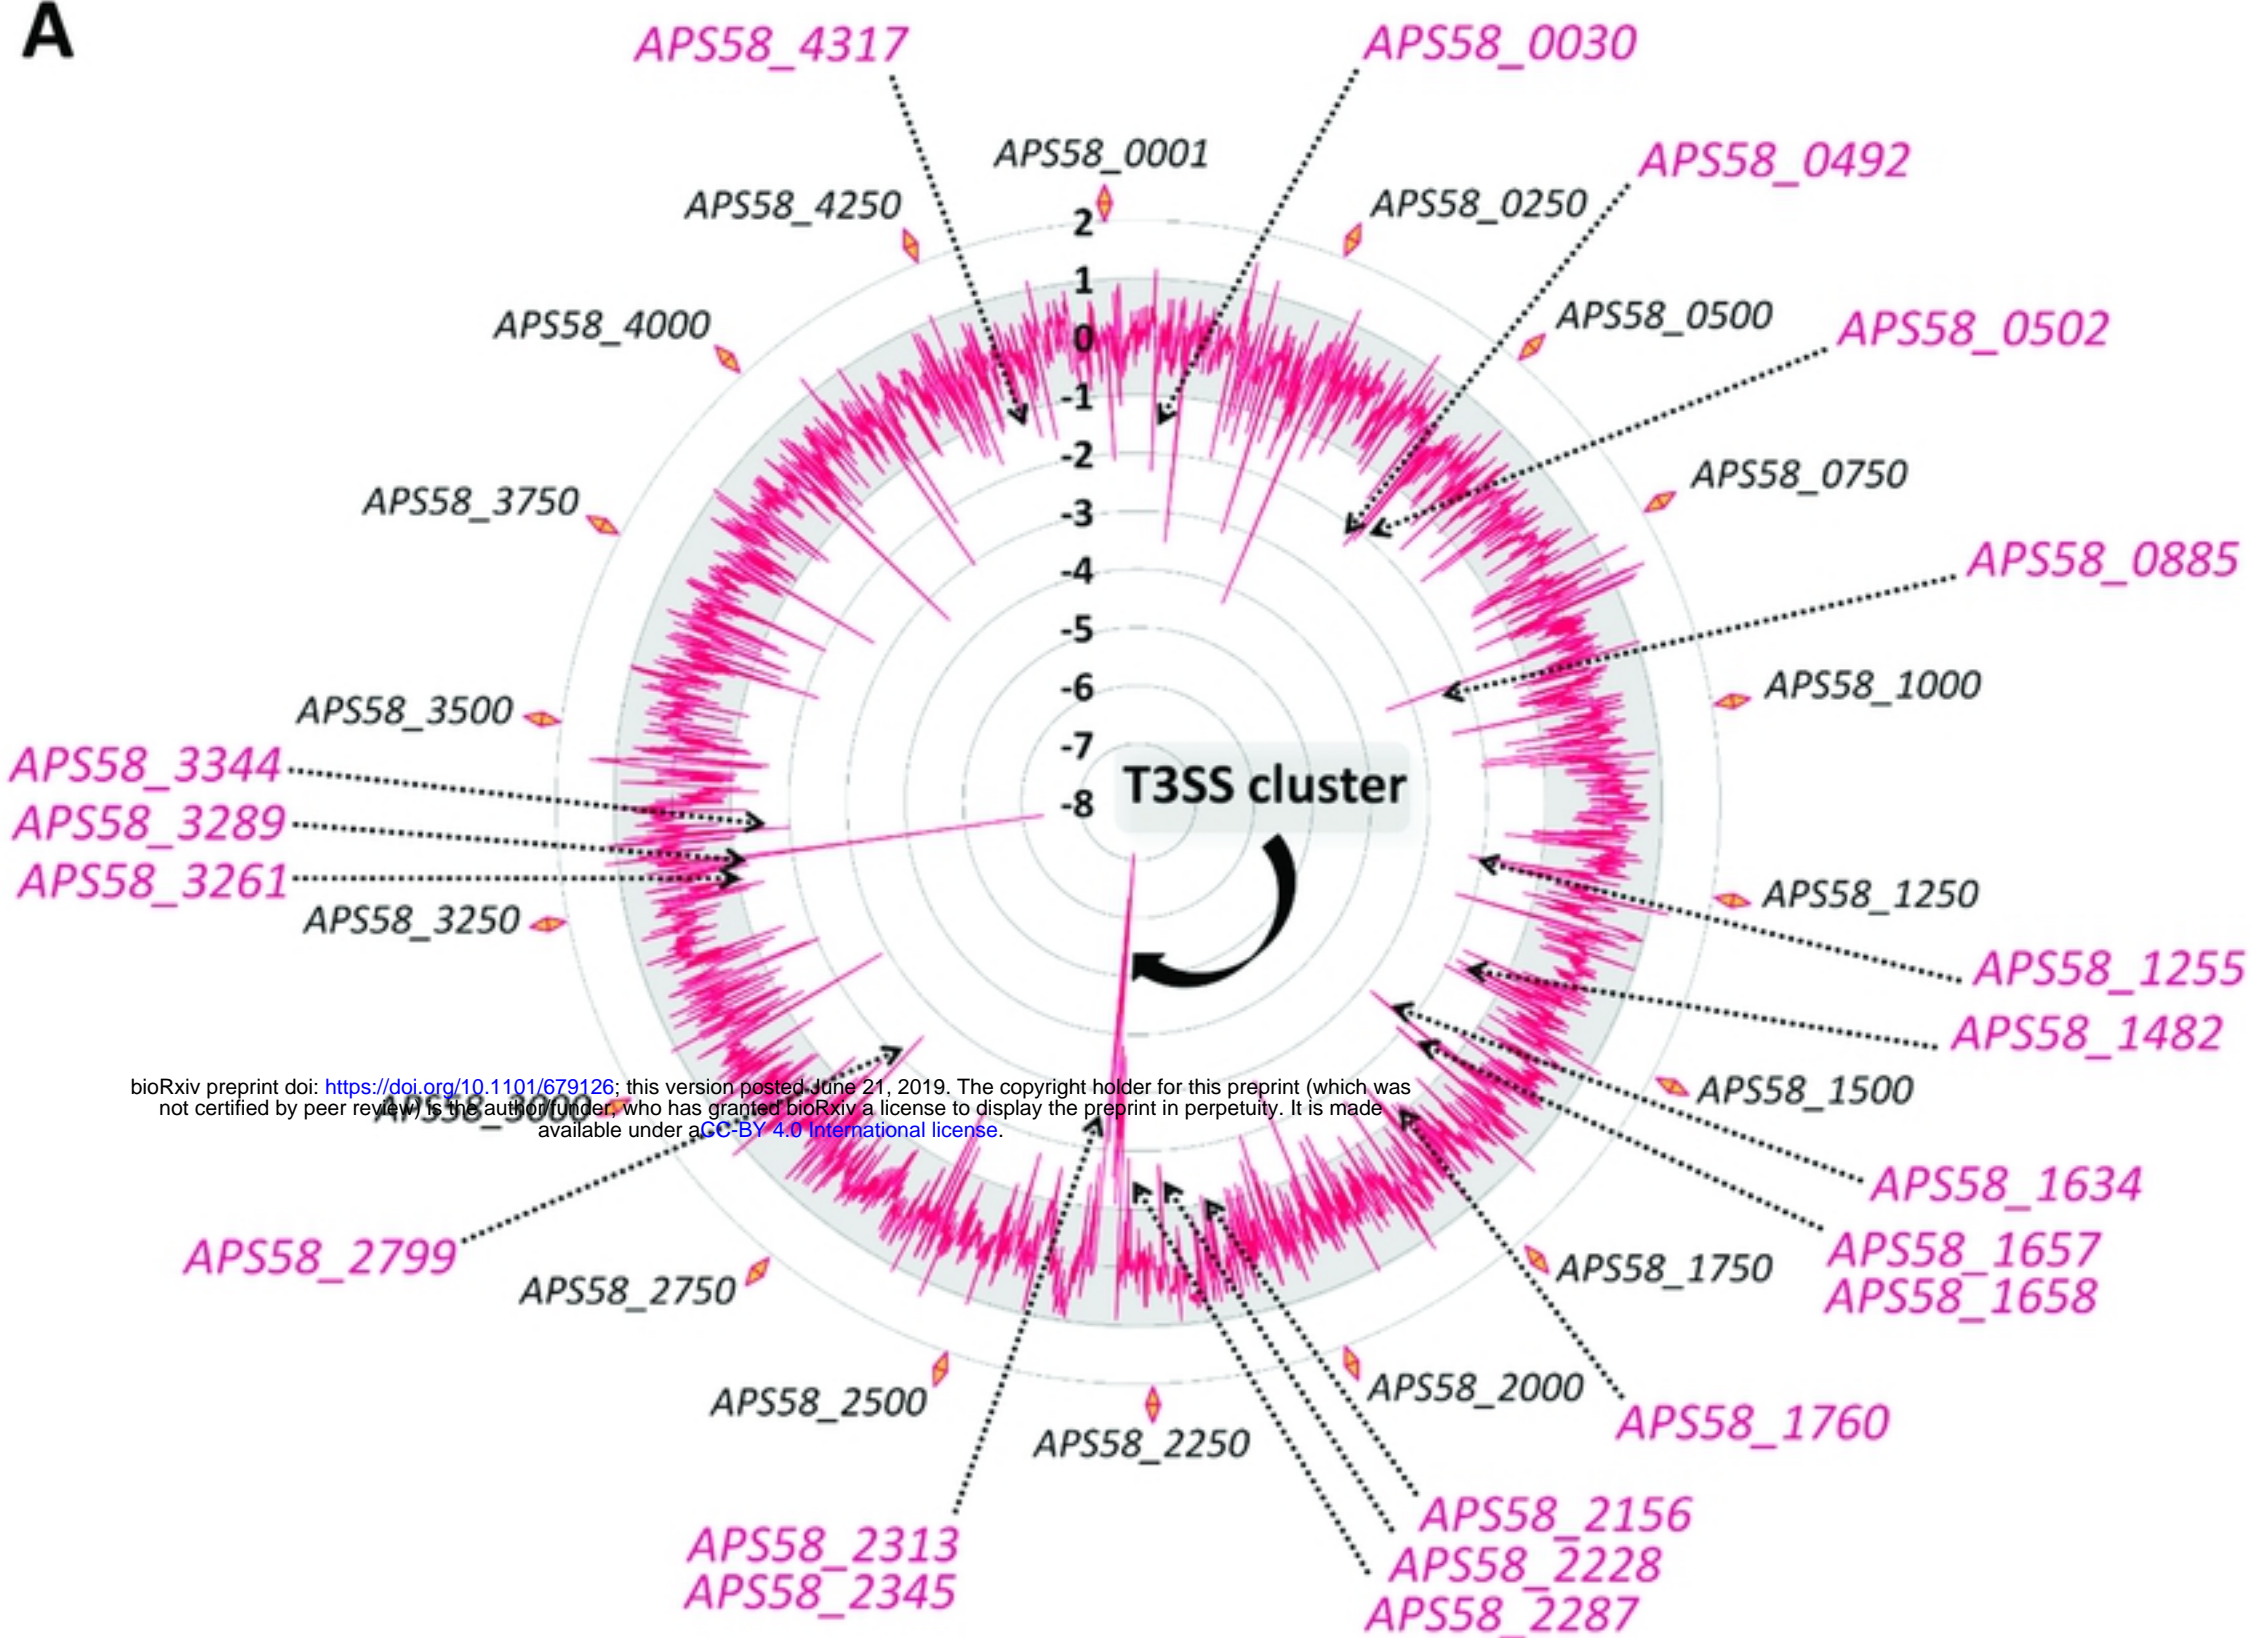**B**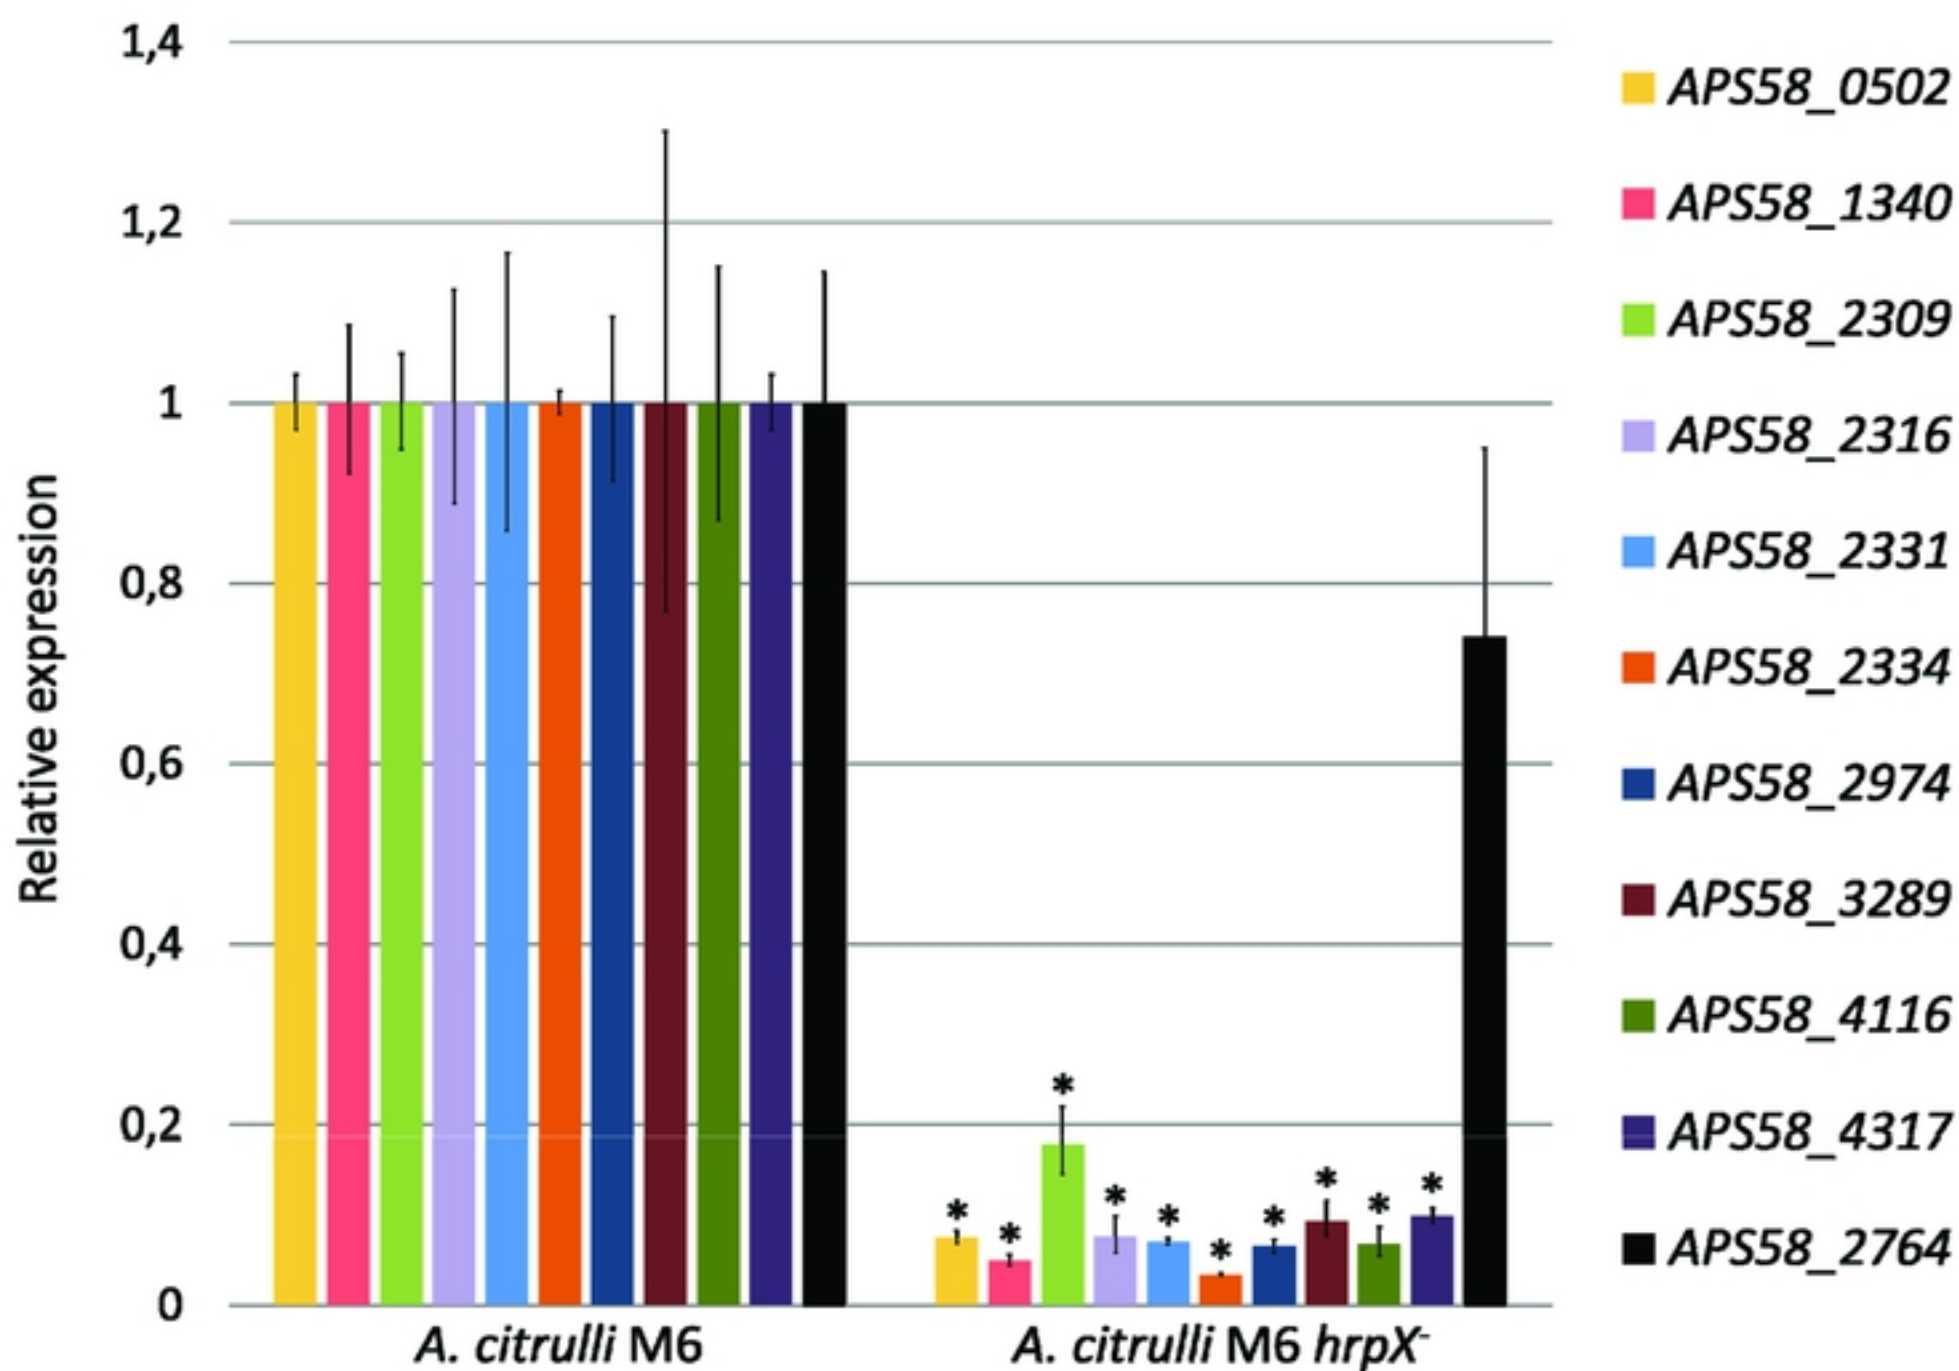

Figure 2

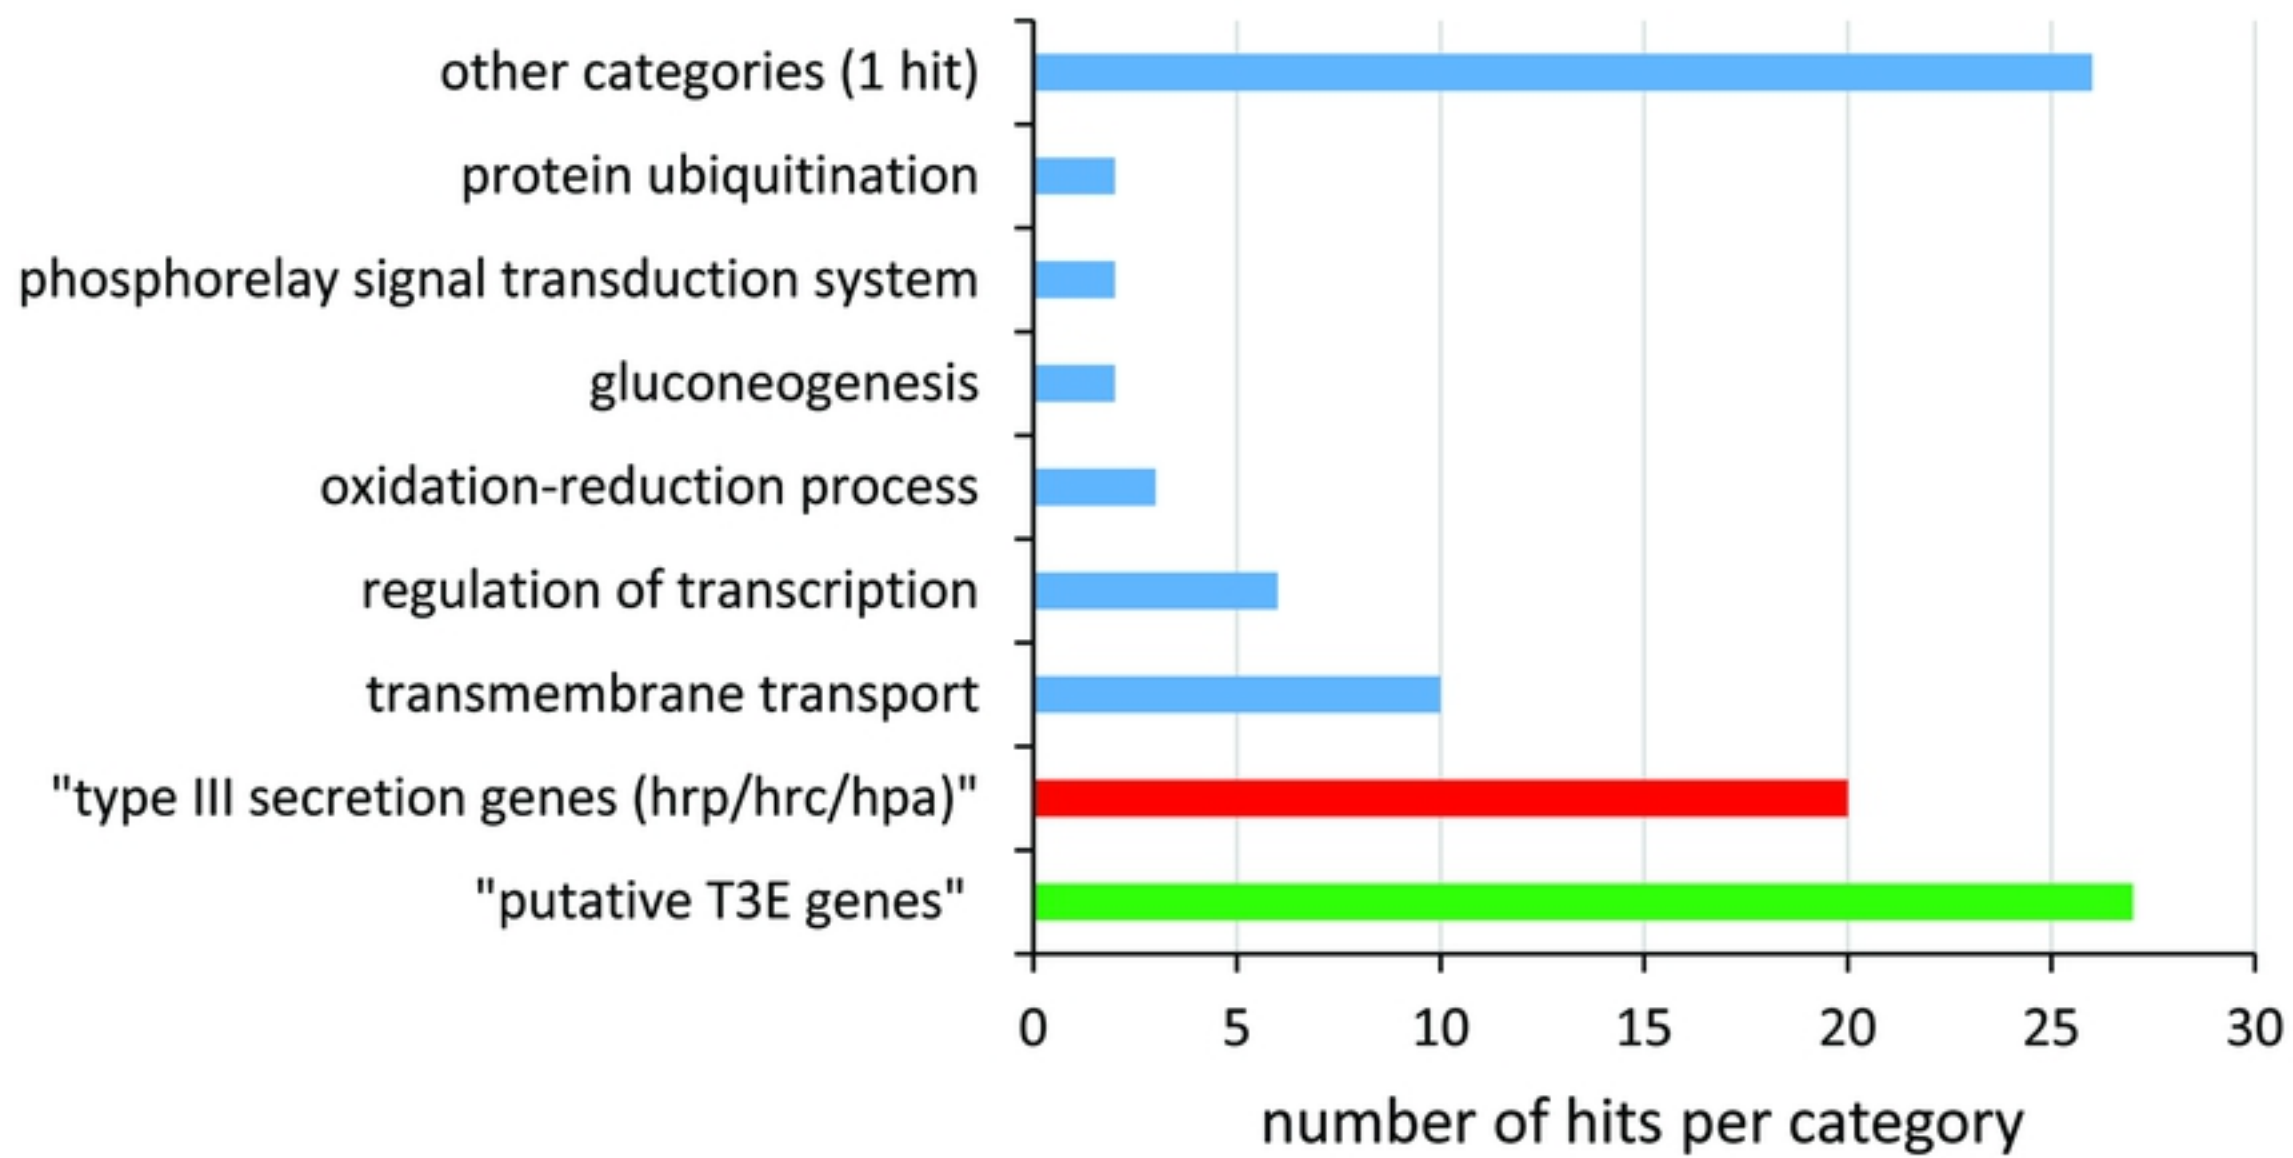

Figure 3

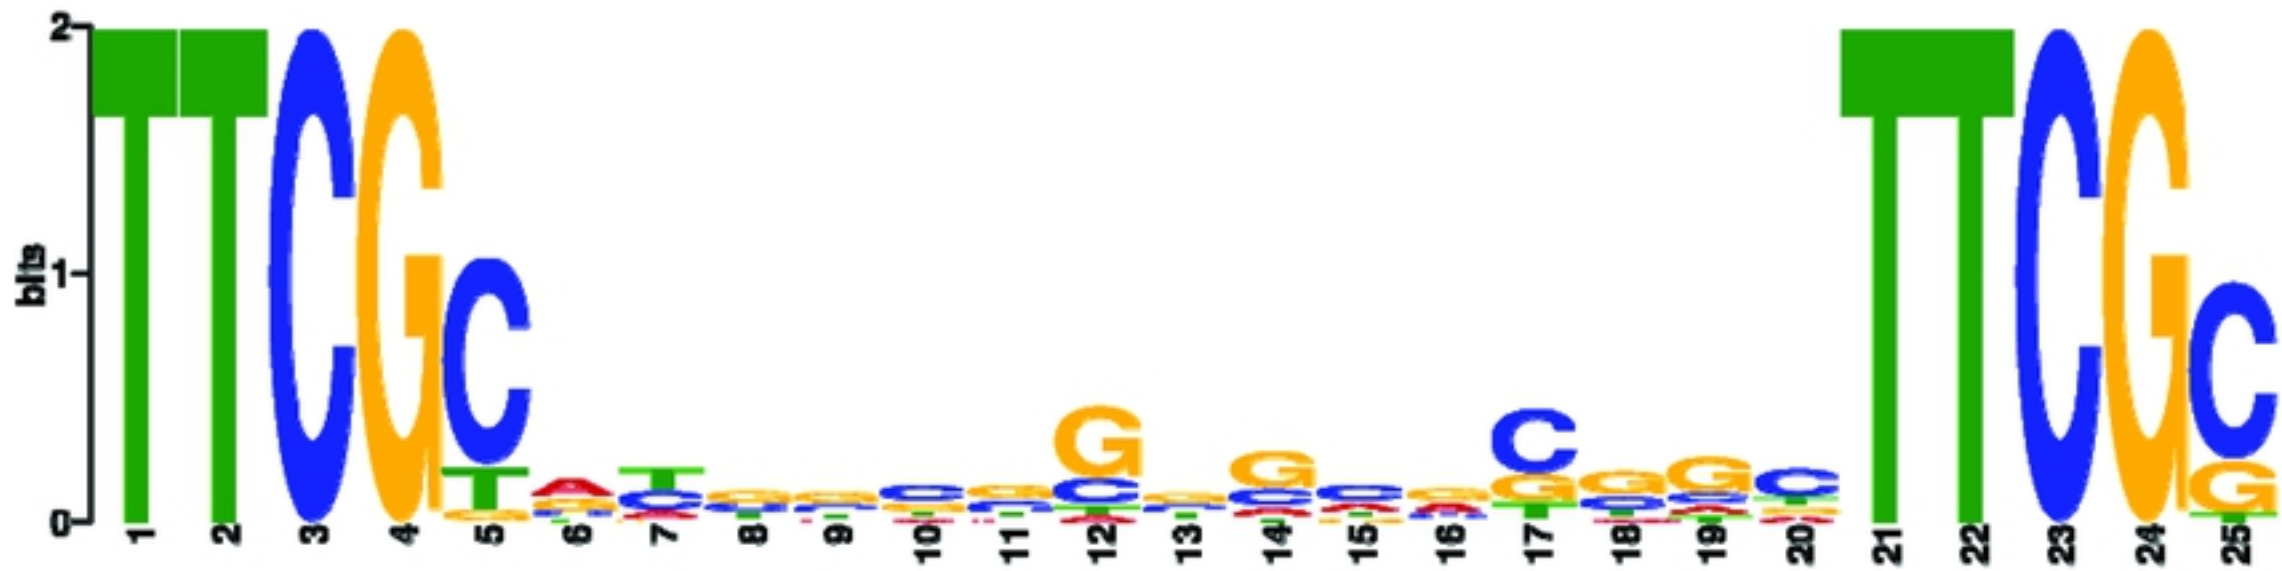

Figure 4



**A**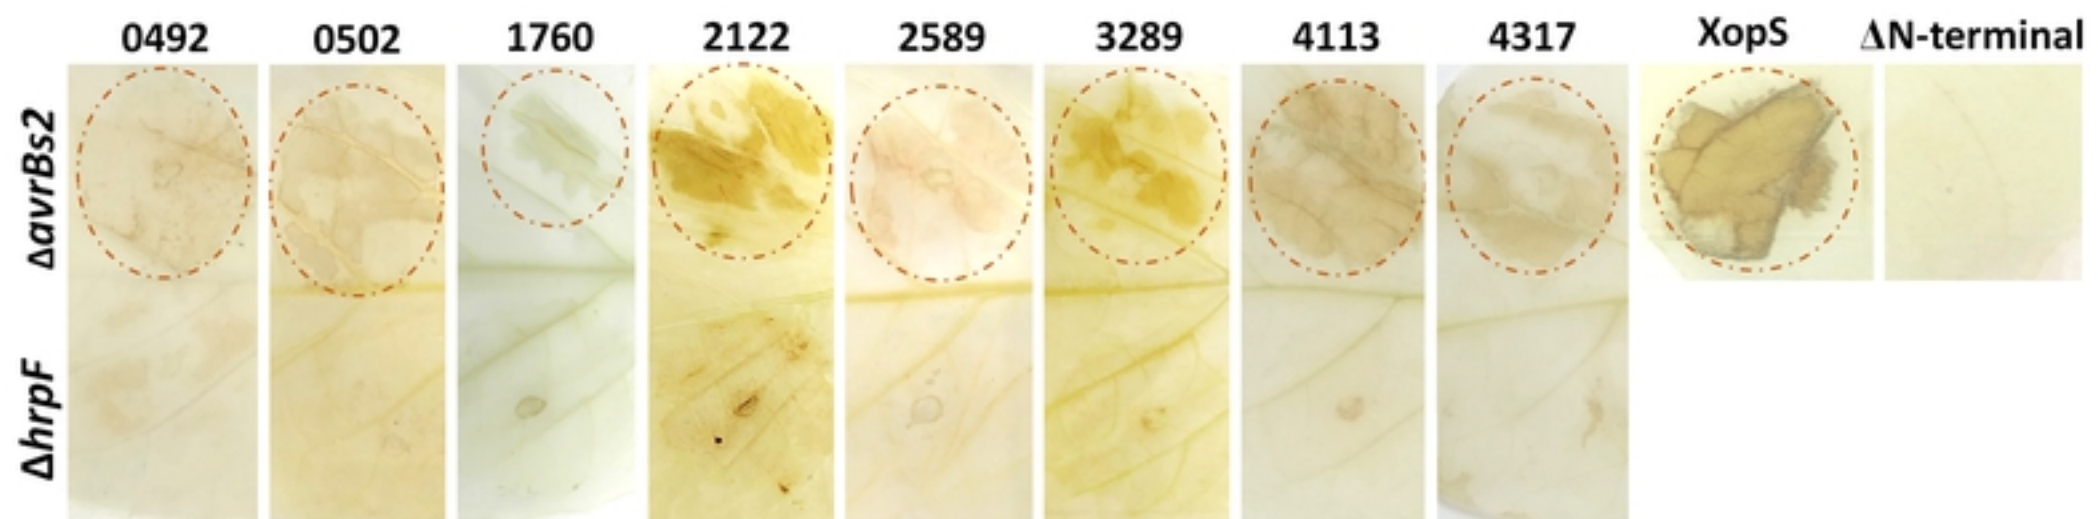**ECW20R**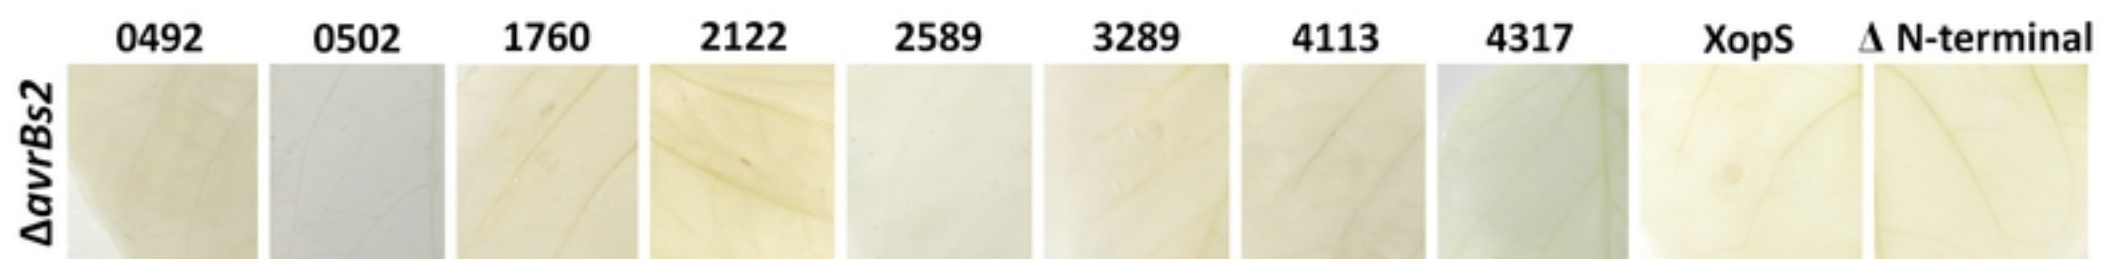**ECW30R****B**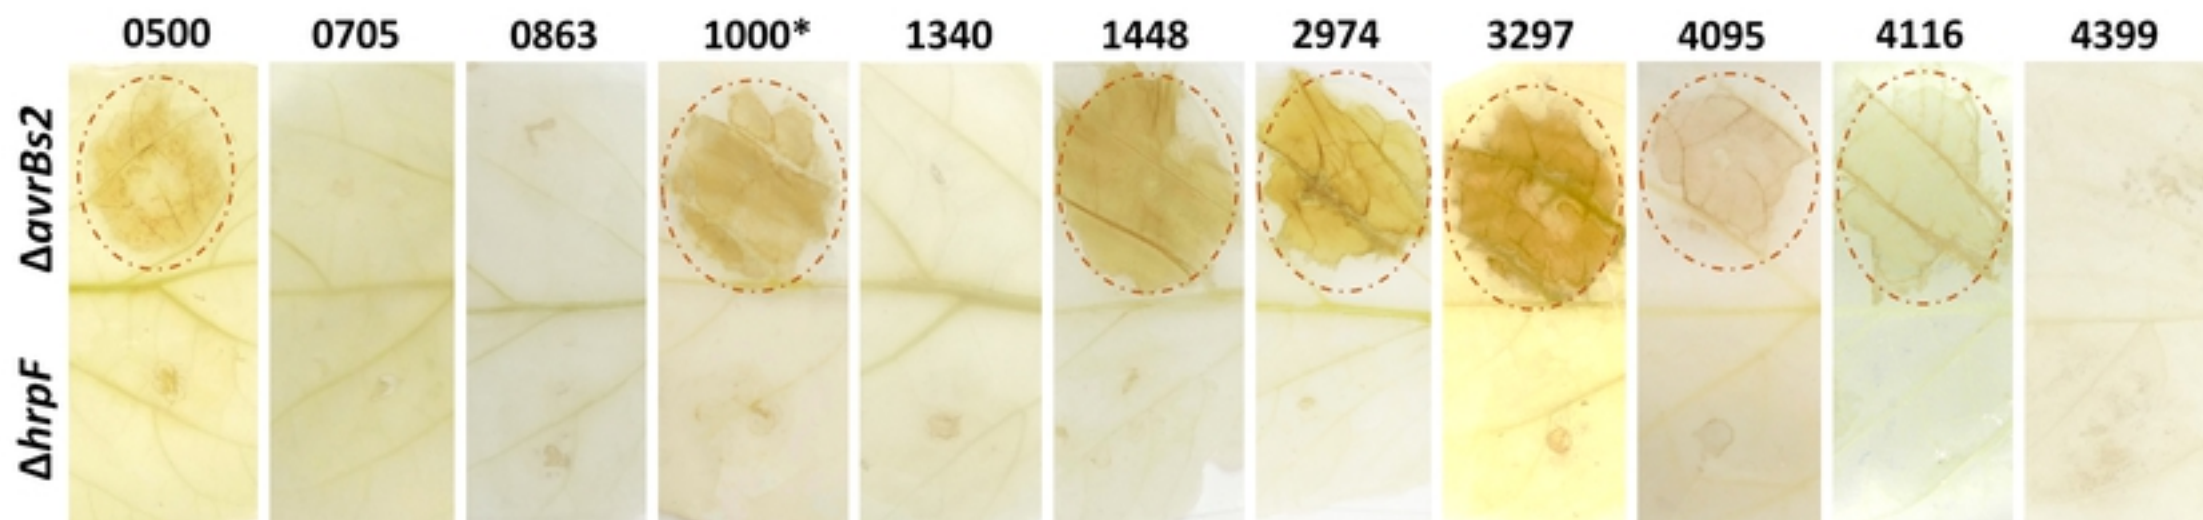**ECW20R**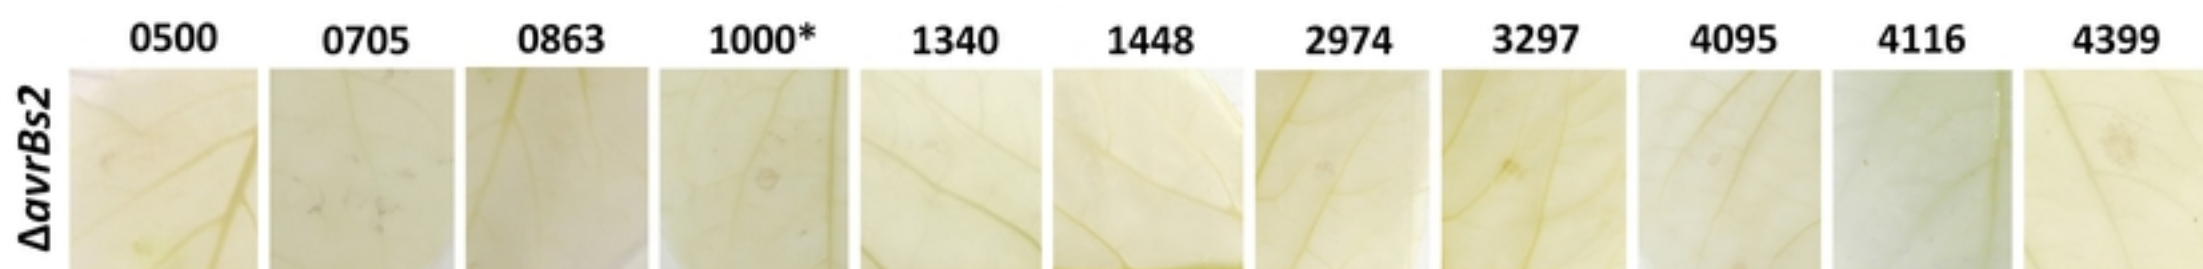**ECW30R**

Figure 5

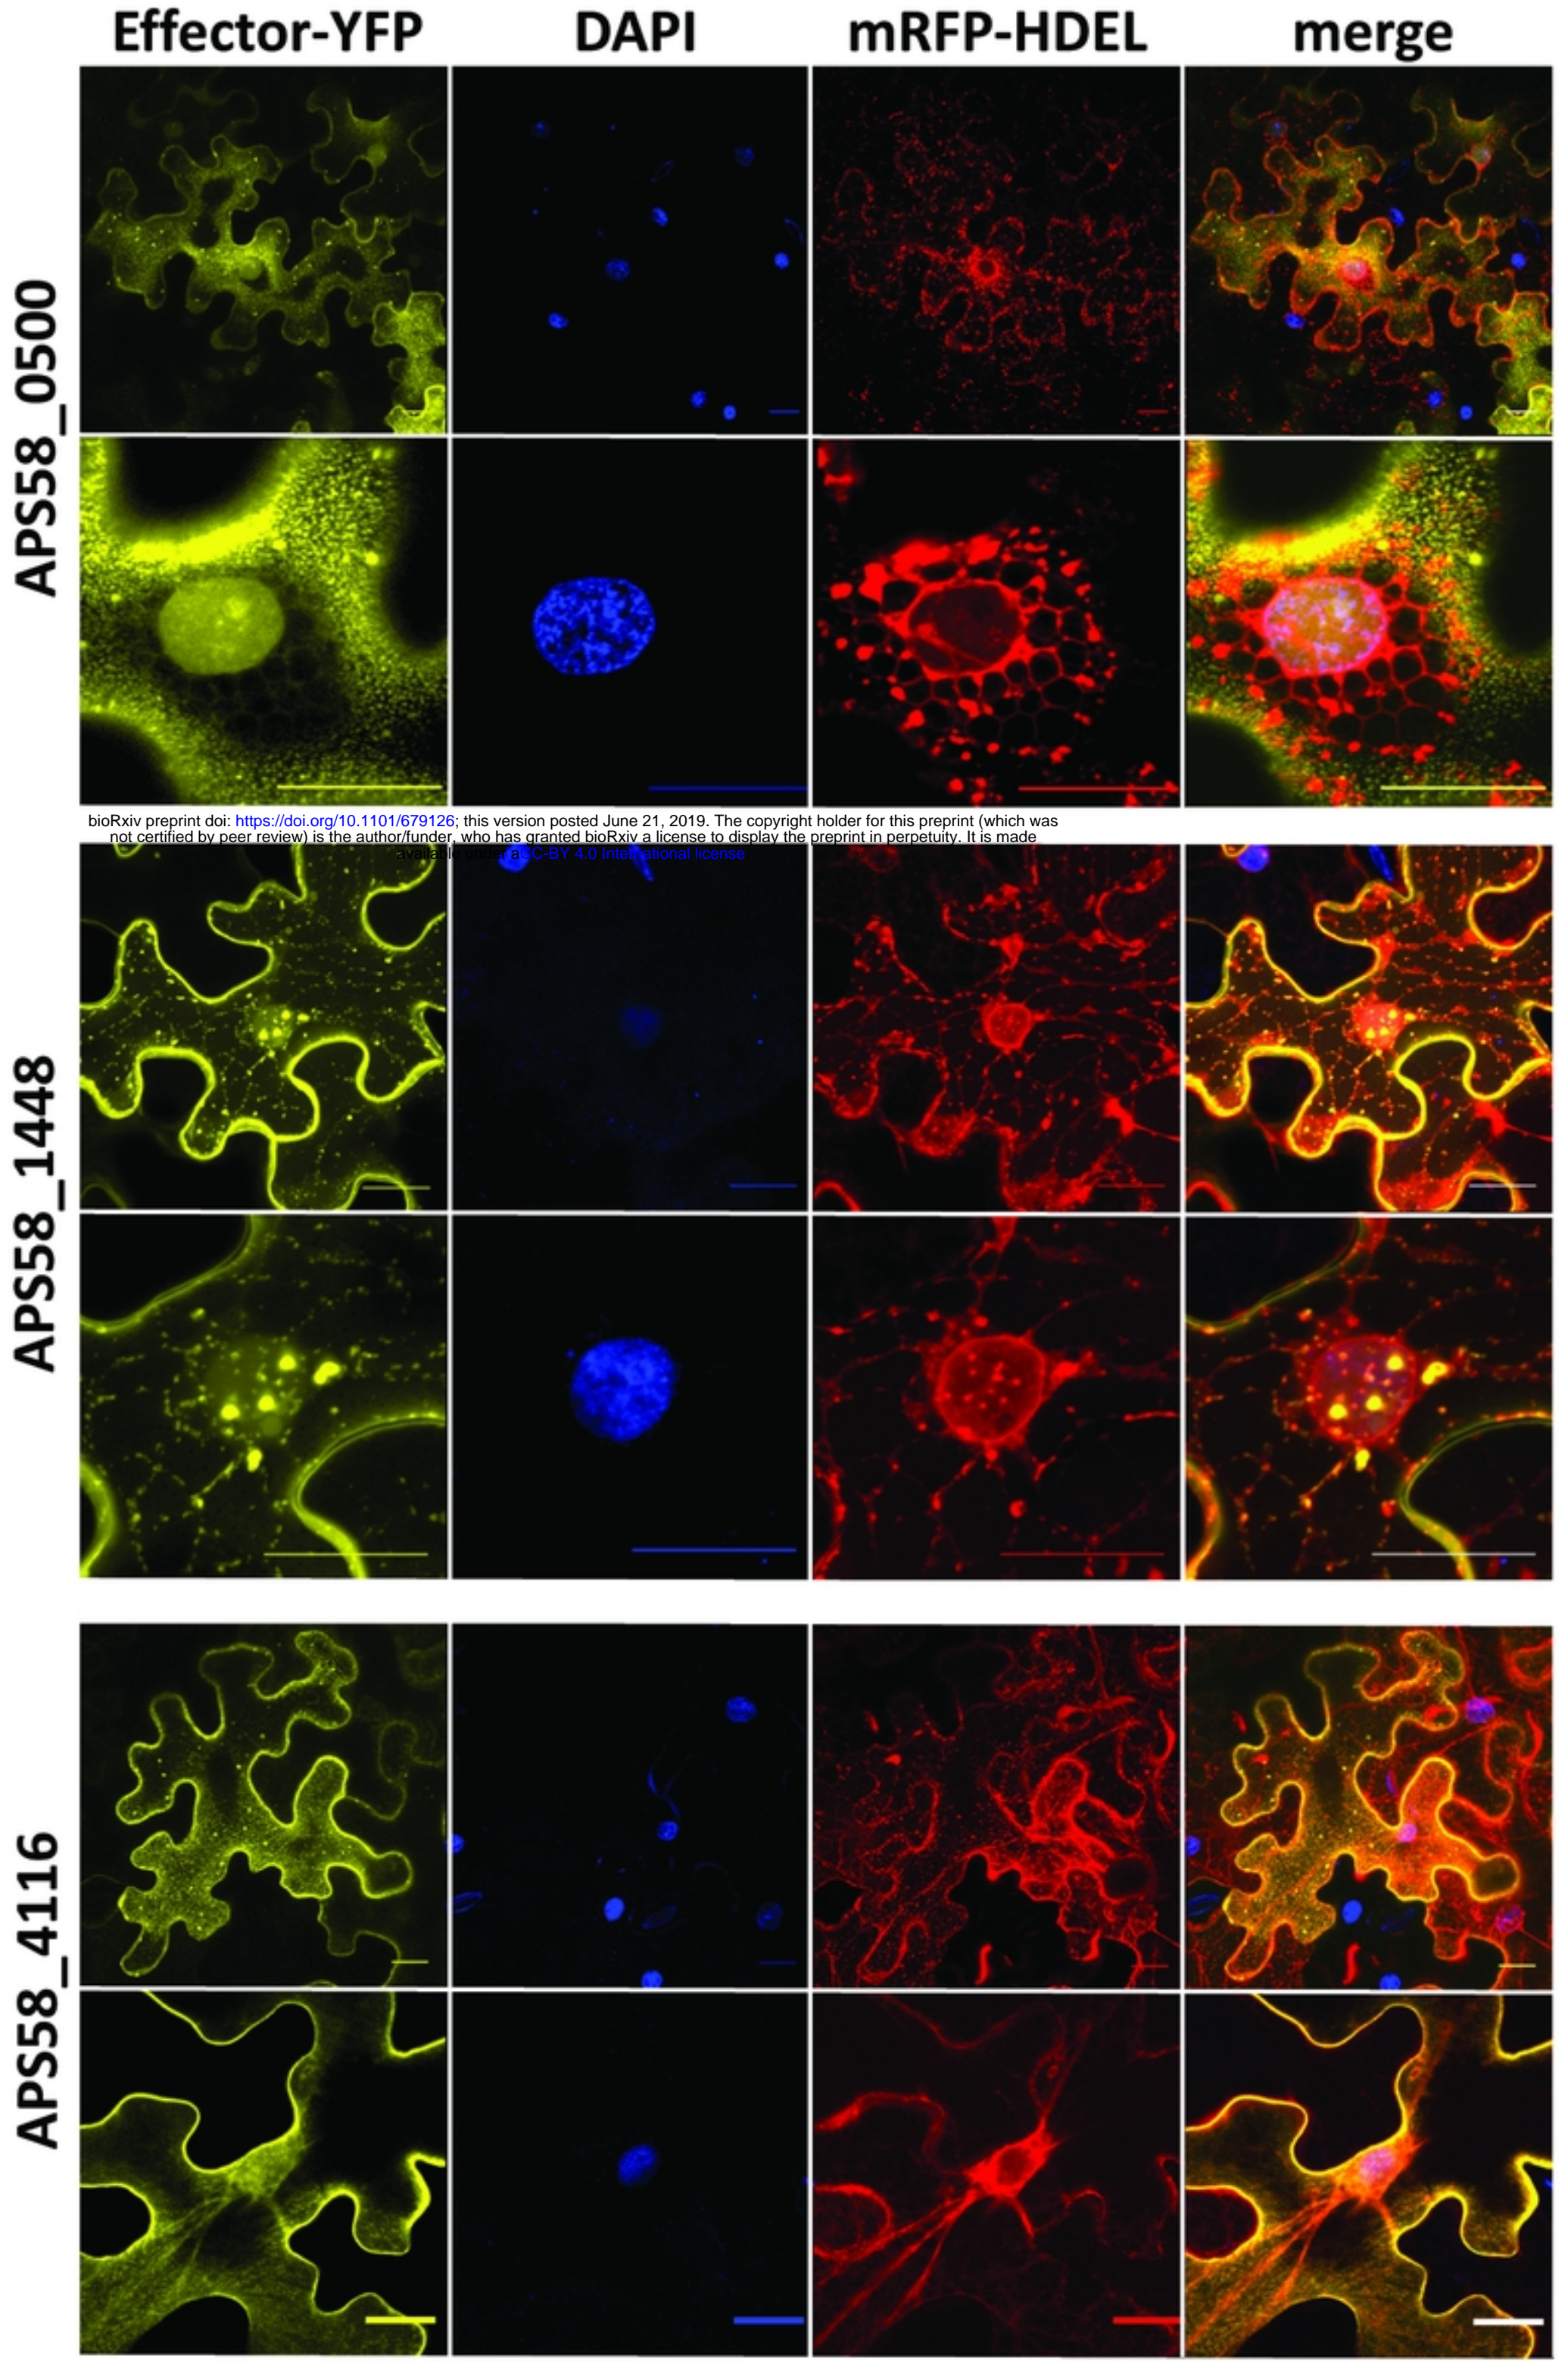

bioRxiv preprint doi: <https://doi.org/10.1101/679126>; this version posted June 21, 2019. The copyright holder for this preprint (which was not certified by peer review) is the author/funder, who has granted bioRxiv a license to display the preprint in perpetuity. It is made available under aCC-BY 4.0 International license.

Figure 6
